# Supplementary material for: Regioselective Cyclic Iminium Formation of Ugi Advanced Intermediates: Rapid Access to 3,4-Dihydropyrazin-2(1H)-ones and Other Diverse Nitrogen-Containing Heterocycles
Source: MDPI journal article supplement (doi:10.3390/molecules28073062), 2023-03-29

# Regioselective Cyclic Iminium Formation of Ugi Advanced Intermediates: Rapid Access to 3,4-Dihydropyrazin-2(1*H*)-ones and Other Diverse Nitrogen-Containing Heterocycles

Naděžda Cankářová <sup>1,\*</sup> and Viktor Krchnák <sup>1,2</sup>

<sup>1</sup> Department of Organic Chemistry, Faculty of Science, Palacký University, 17 listopadu 12, 771 46 Olomouc, Czech Republic; viktor.krchnak.1@nd.edu

<sup>2</sup> Department of Chemistry and Biochemistry, 251 Nieuwland Science Center, University of Notre Dame, Notre Dame, IN 46556, USA

\* Correspondence: nadezda.cankarova@upol.cz

## Table of Contents

|                                                         |    |
|---------------------------------------------------------|----|
| 1. <sup>1</sup> H and <sup>13</sup> C NMR Spectra ..... | S2 |
|---------------------------------------------------------|----|

## 1. $^1\text{H}$ and $^{13}\text{C}$ NMR Spectra

$^1\text{H}$  and  $^{13}\text{C}$  NMR spectra ( $d_6$ -DMSO) for compound 2a

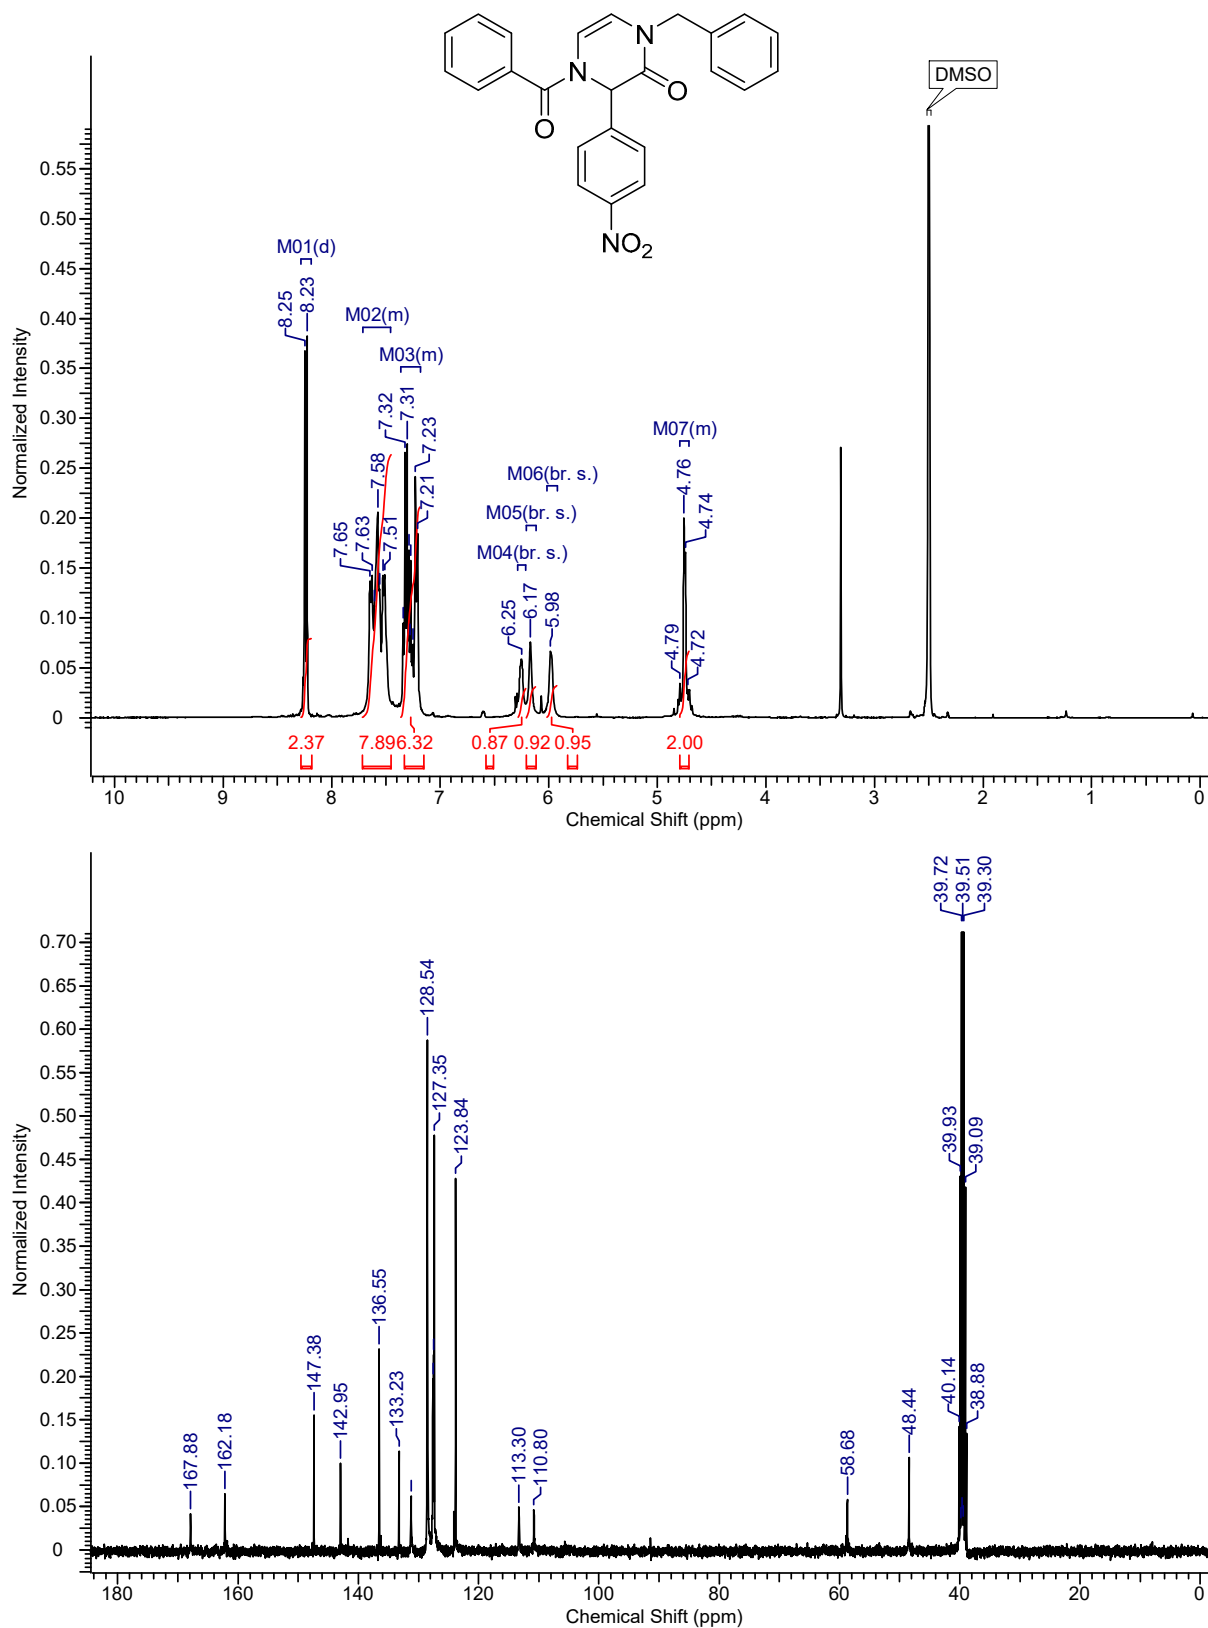

$^1\text{H}$  and  $^{13}\text{C}$  NMR spectra ( $d_6$ -DMSO) for compound 2b

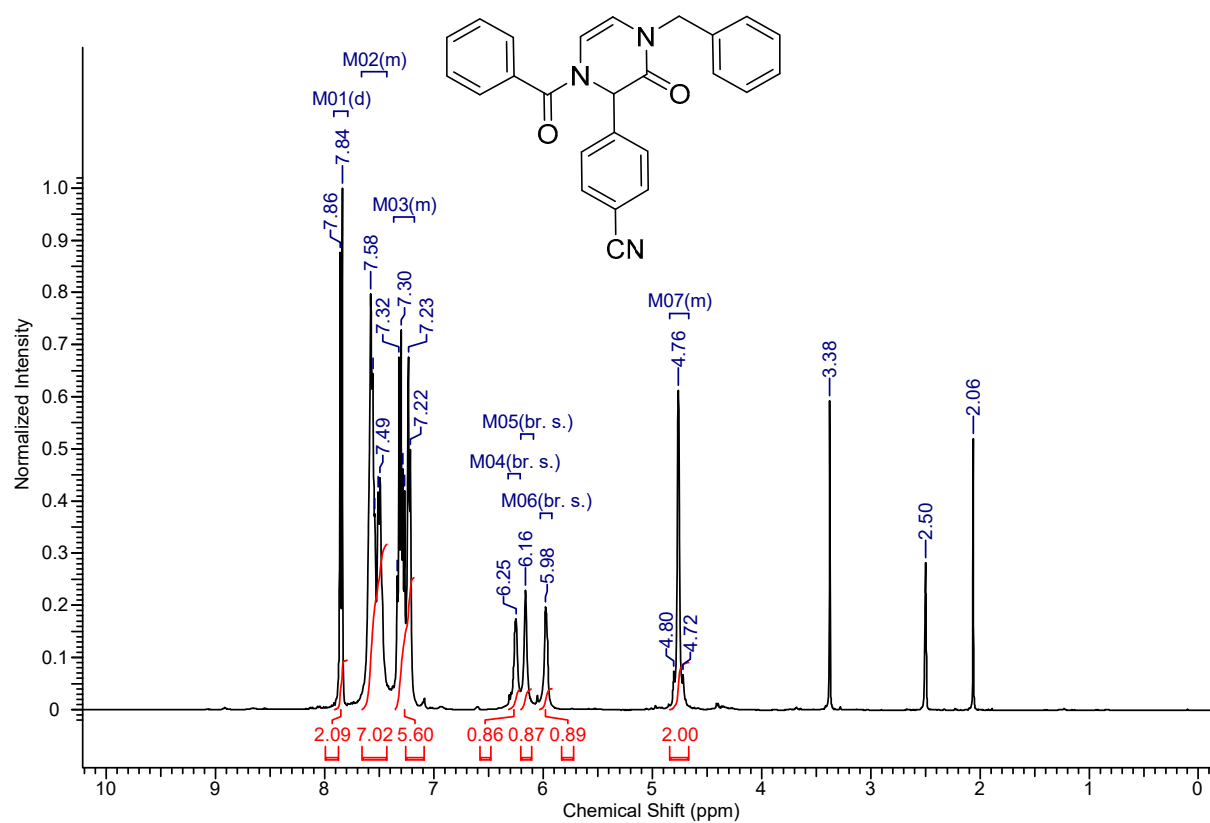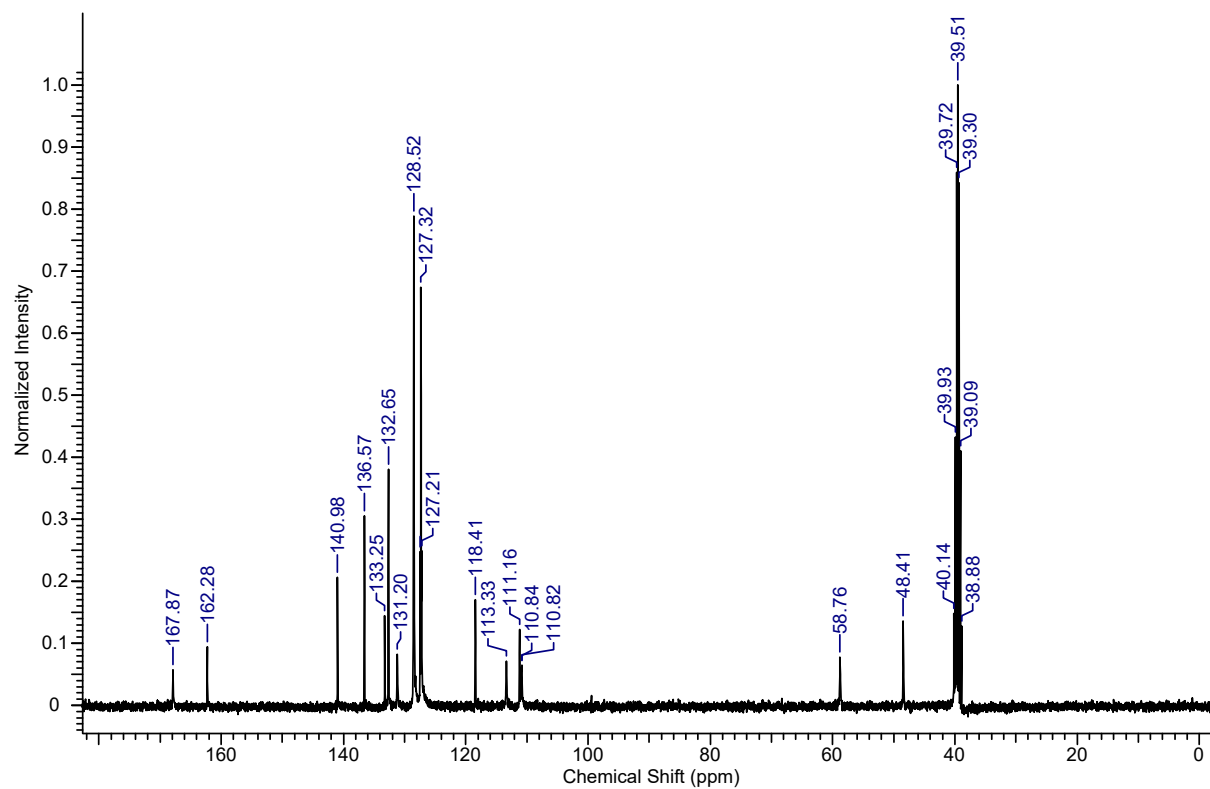

<sup>1</sup>H and <sup>13</sup>C NMR spectra (*d*<sub>6</sub>-DMSO) for compound 2c

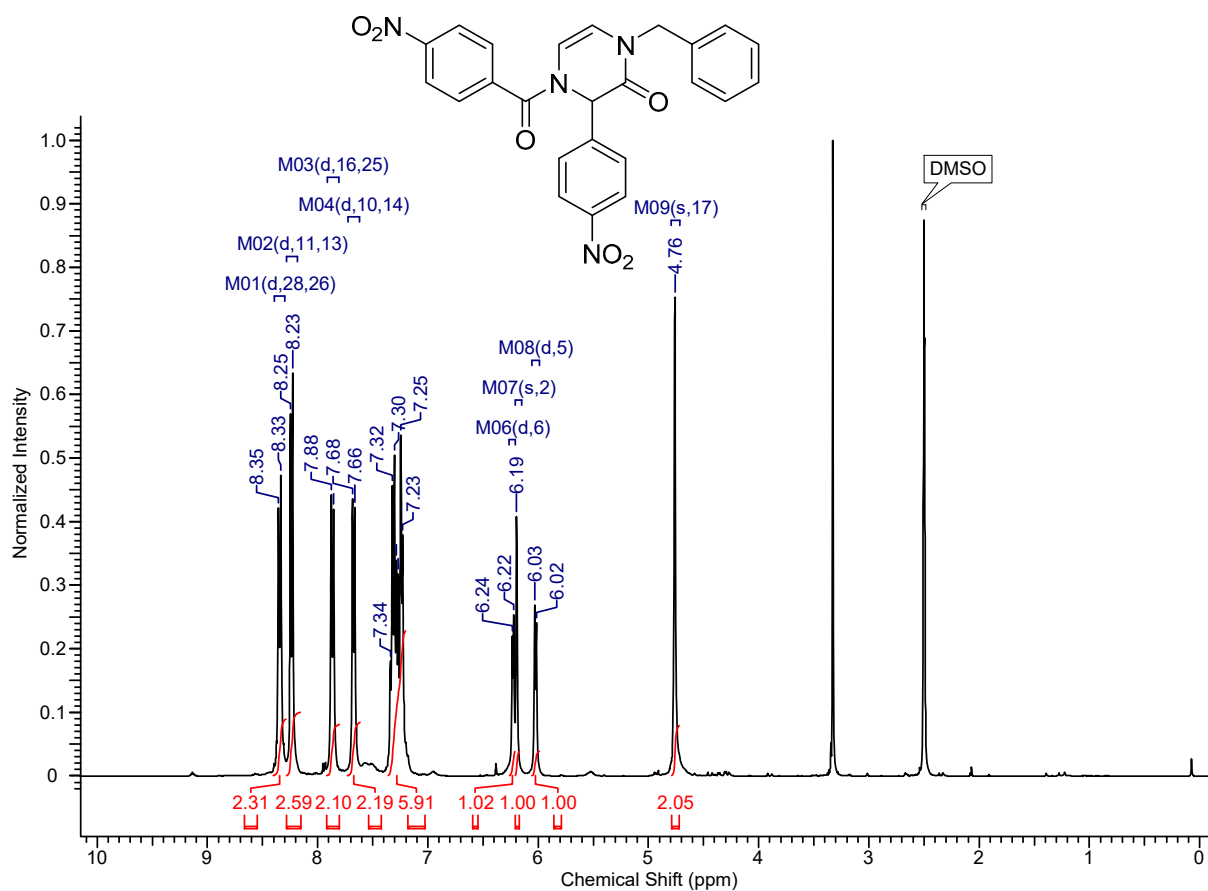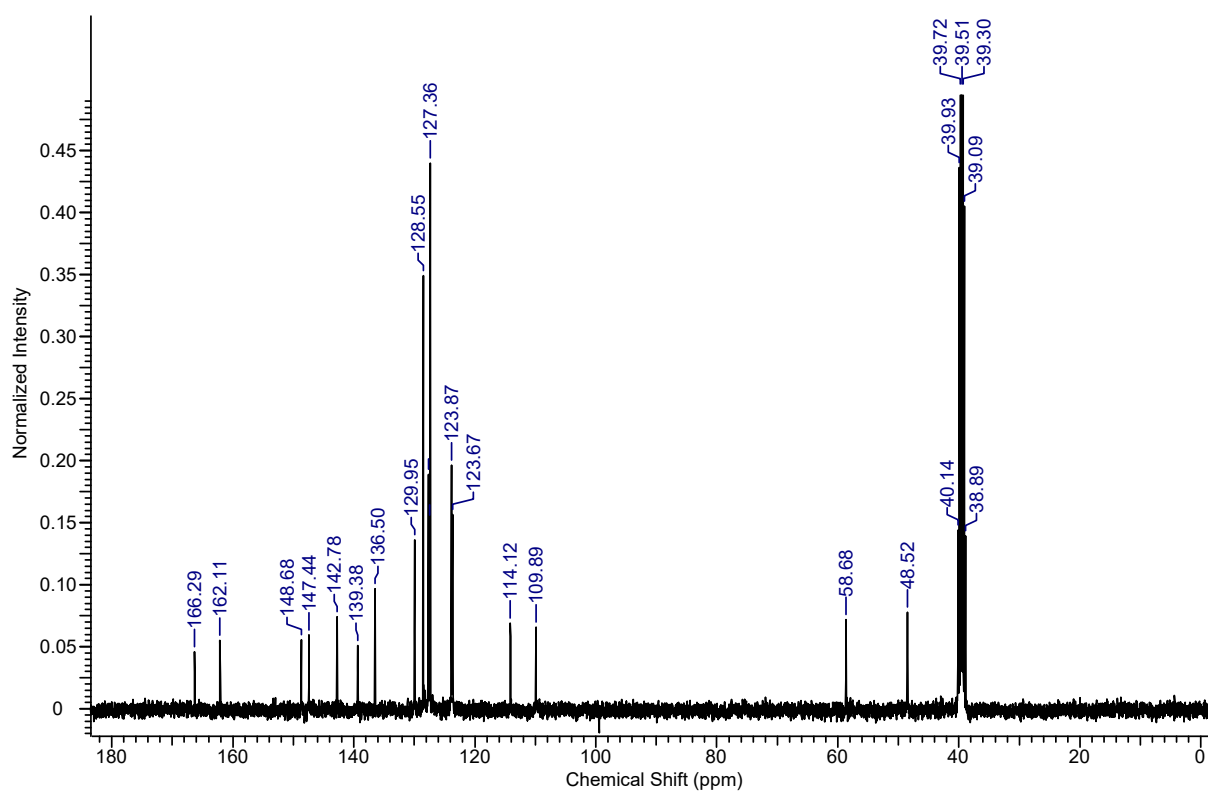

<sup>1</sup>H and <sup>13</sup>C NMR spectra (*d*<sub>6</sub>-DMSO) for compound 2d

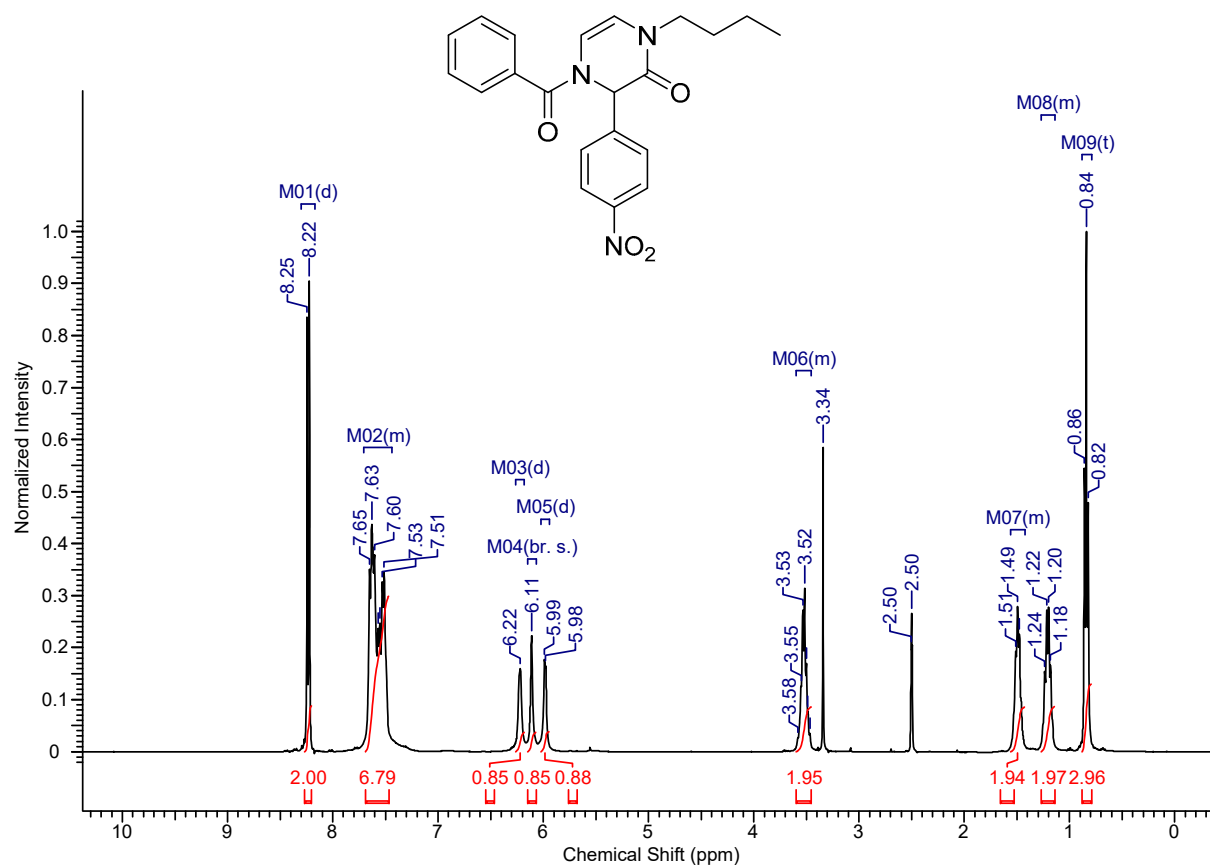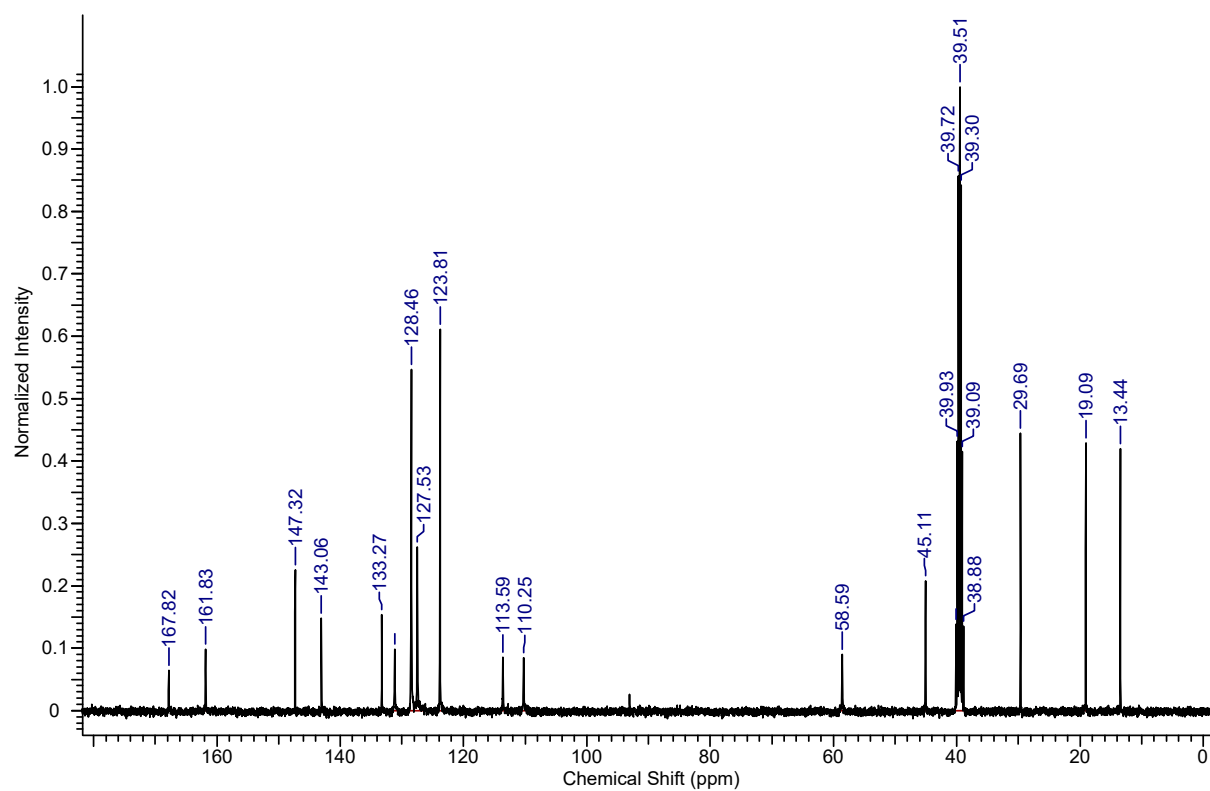

$^1\text{H}$  and  $^{13}\text{C}$  NMR spectra ( $d_6$ -DMSO) for compound 2e

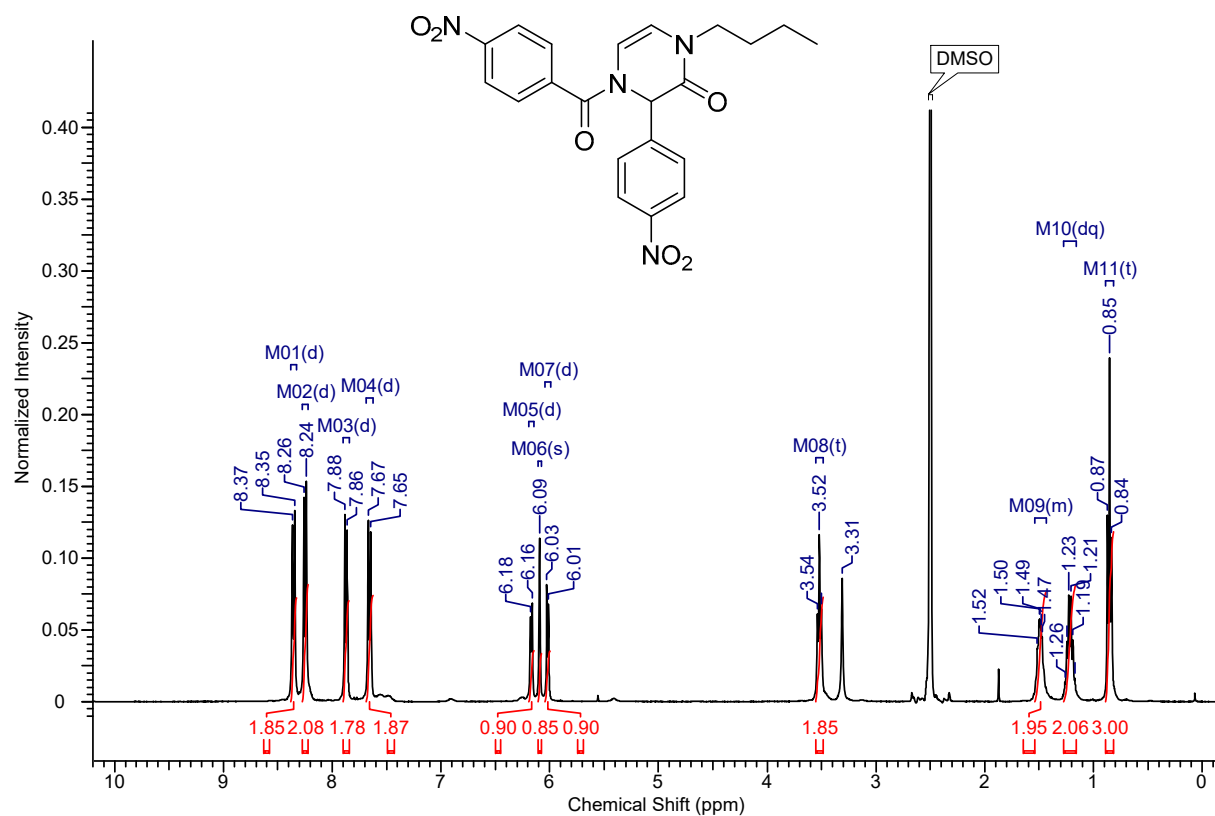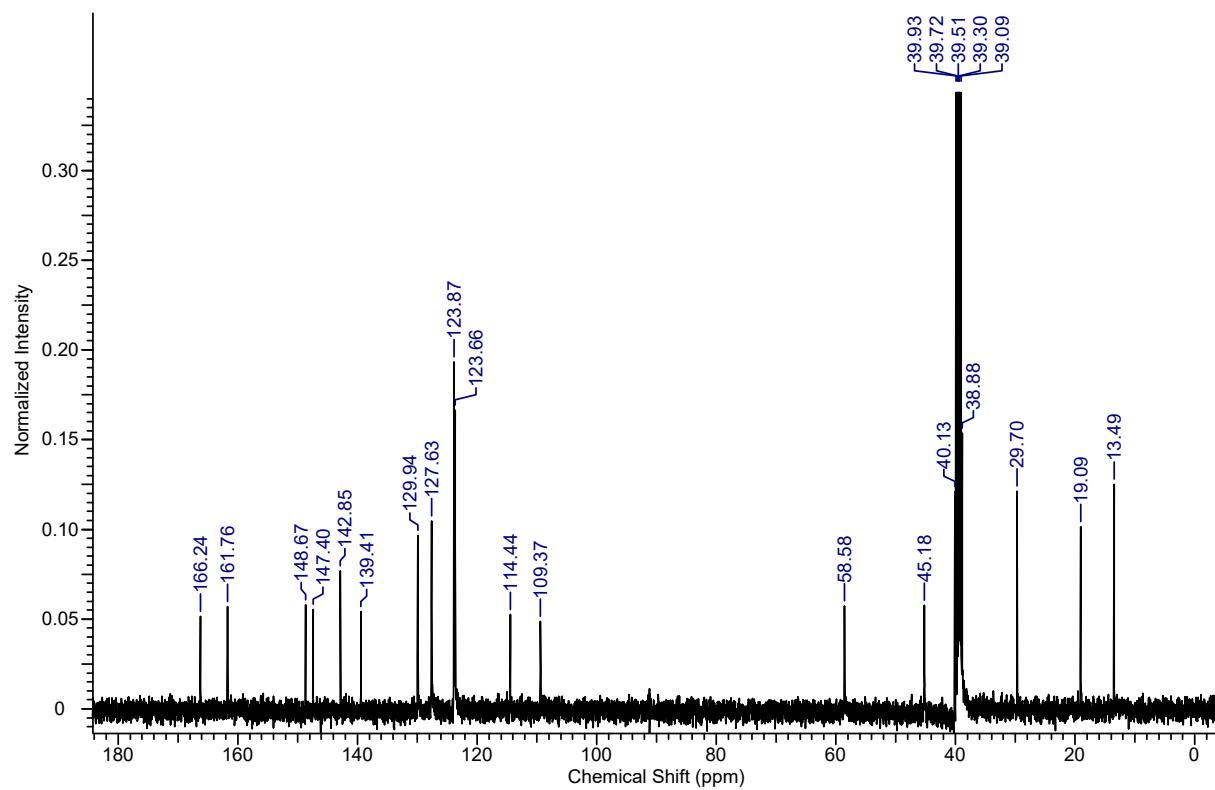

$^1\text{H}$  and  $^{13}\text{C}$  NMR spectra ( $d_6$ -DMSO) for compound 2f

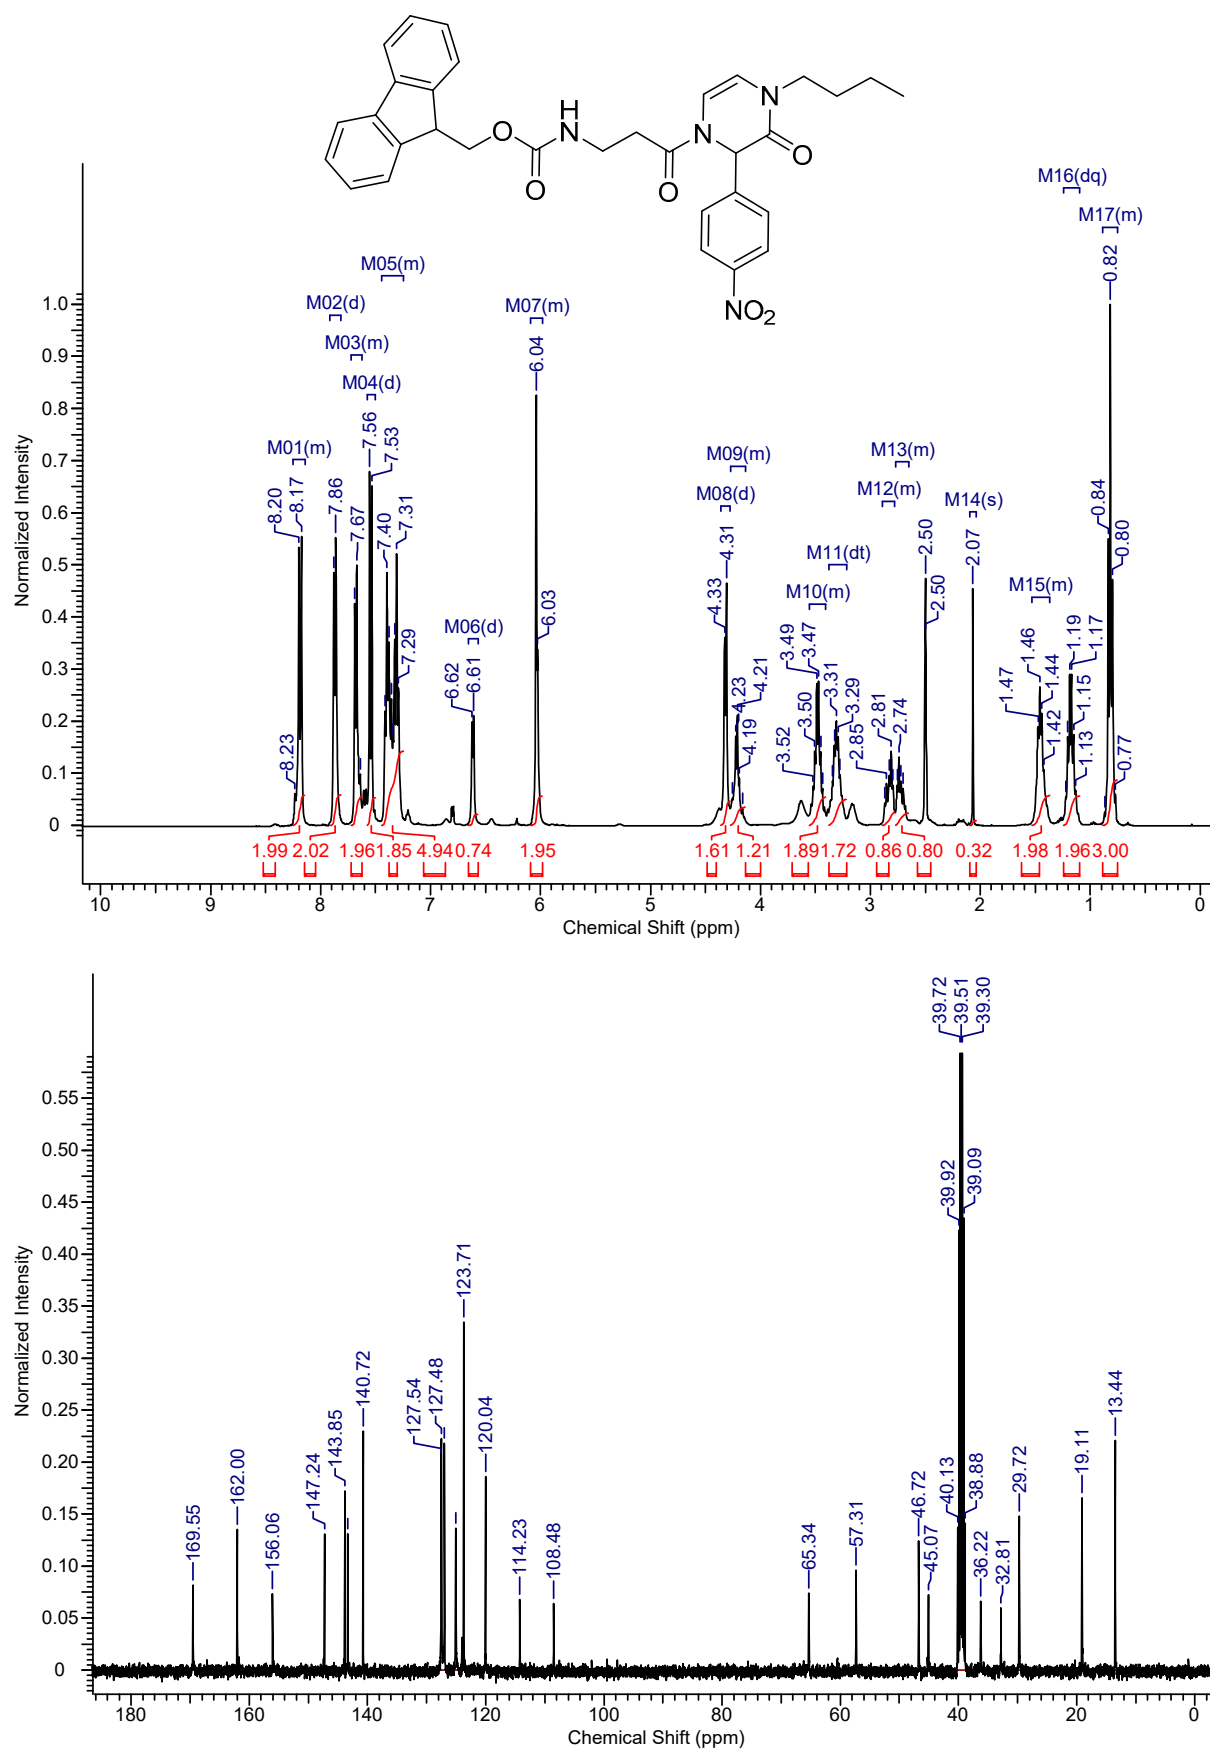

$^1\text{H} - ^1\text{H}$  COSY spectrum ( $d_6$ -DMSO) for compound 2f

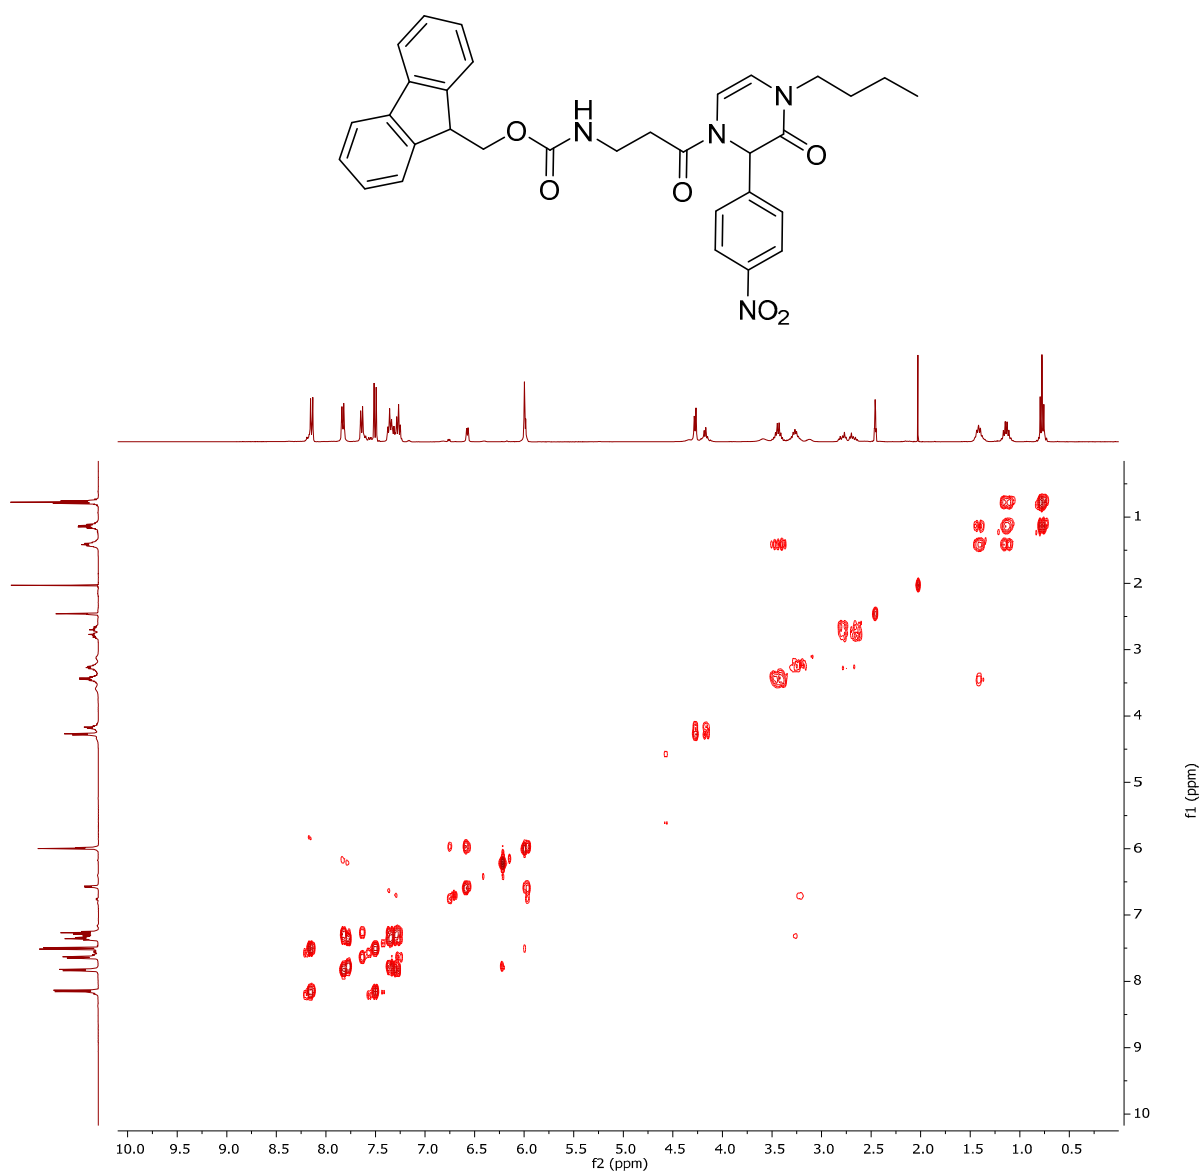



$^1\text{H}$  and  $^{13}\text{C}$  NMR spectra ( $d_6$ -DMSO) for compound 2g

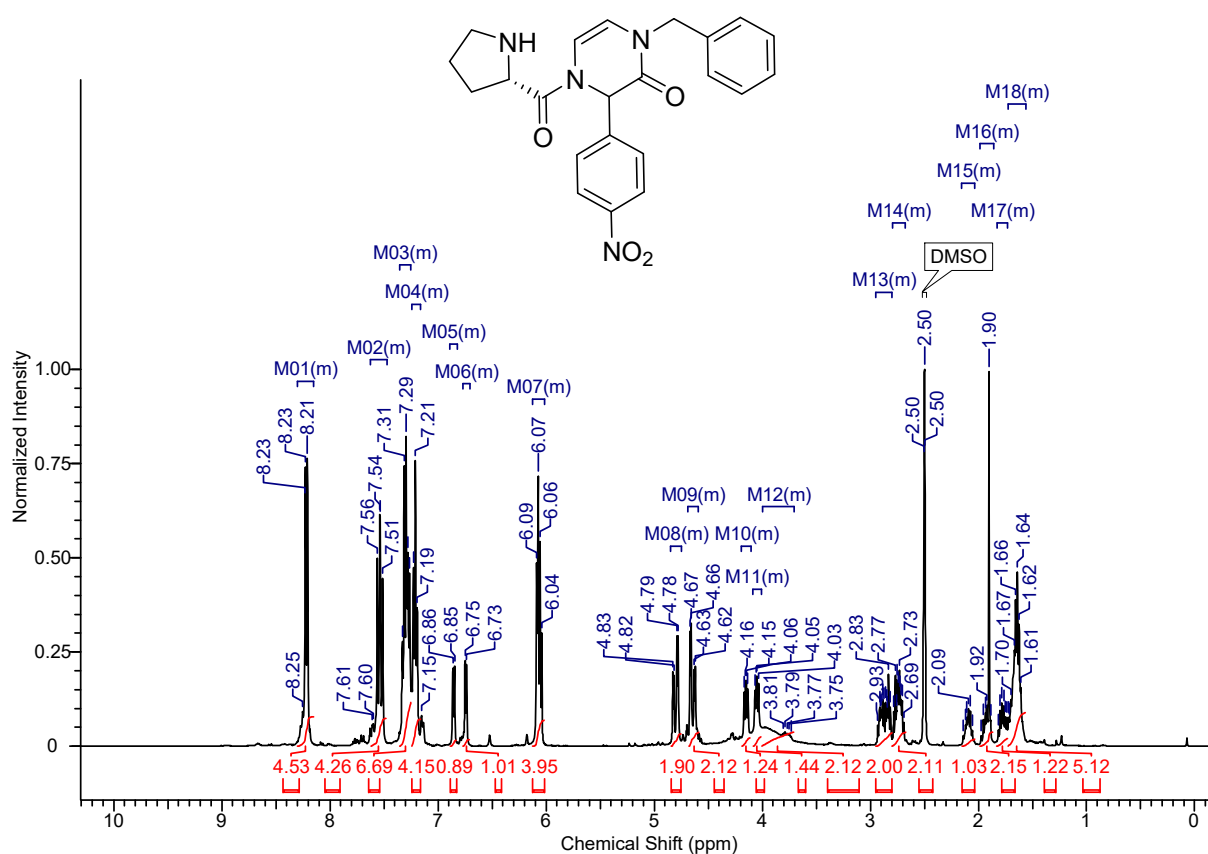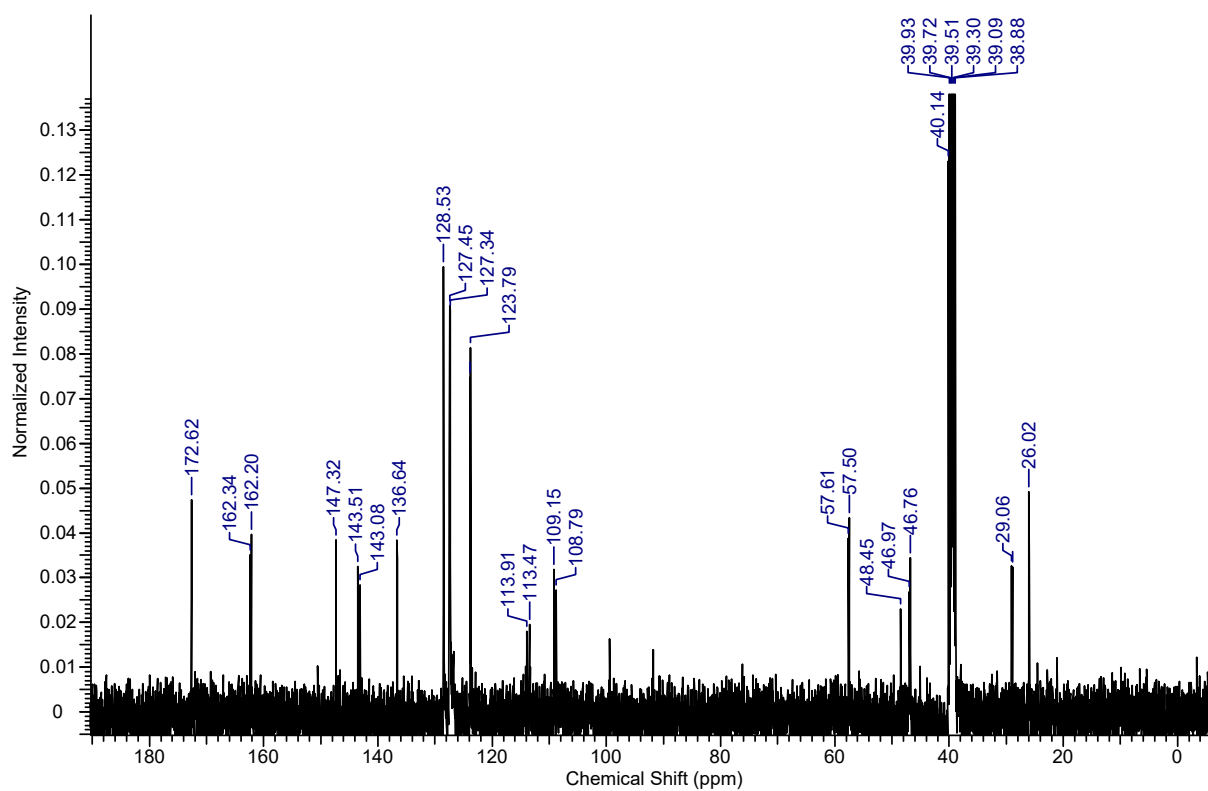

$^1\text{H} - ^1\text{H}$  COSY spectrum ( $d_6$ -DMSO) for compound 2g

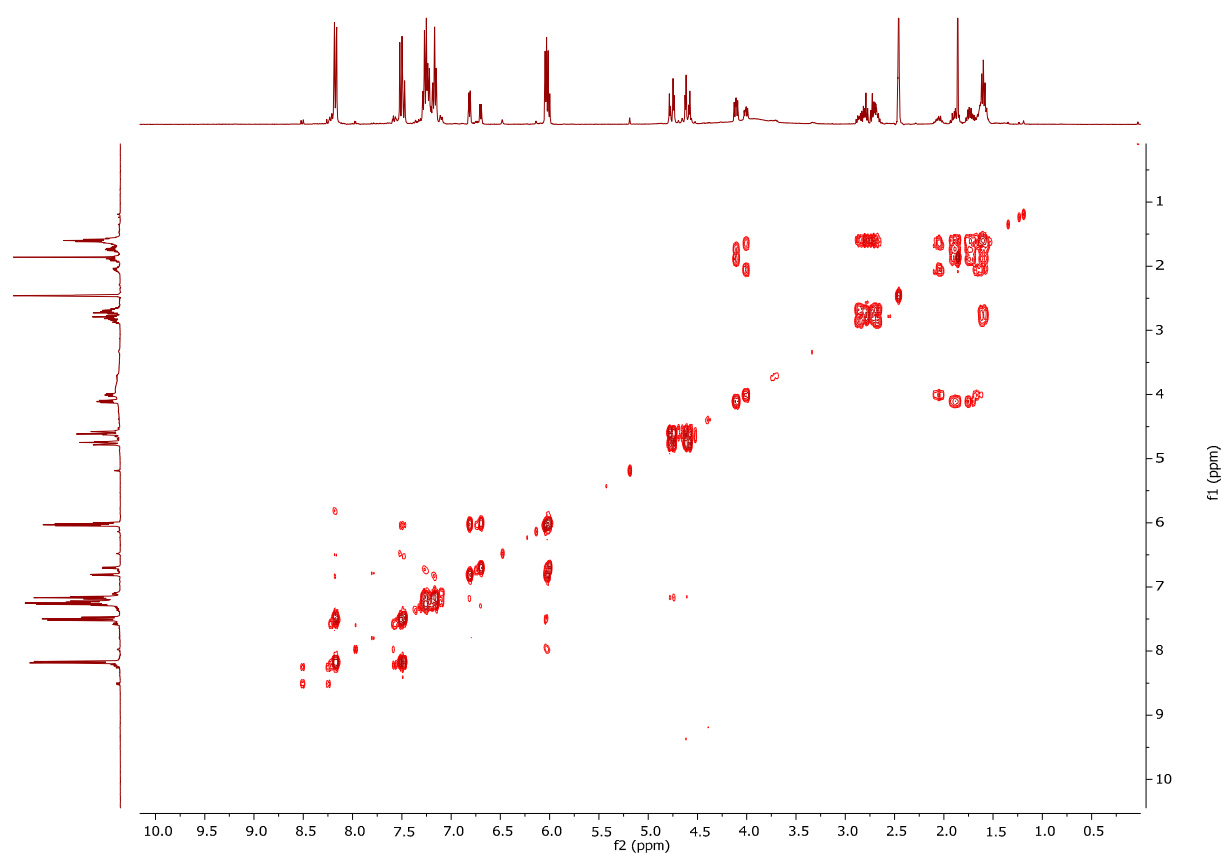

$^1\text{H} - ^{13}\text{C}$  HMBC spectrum ( $d_6$ -DMSO) for compound 2g

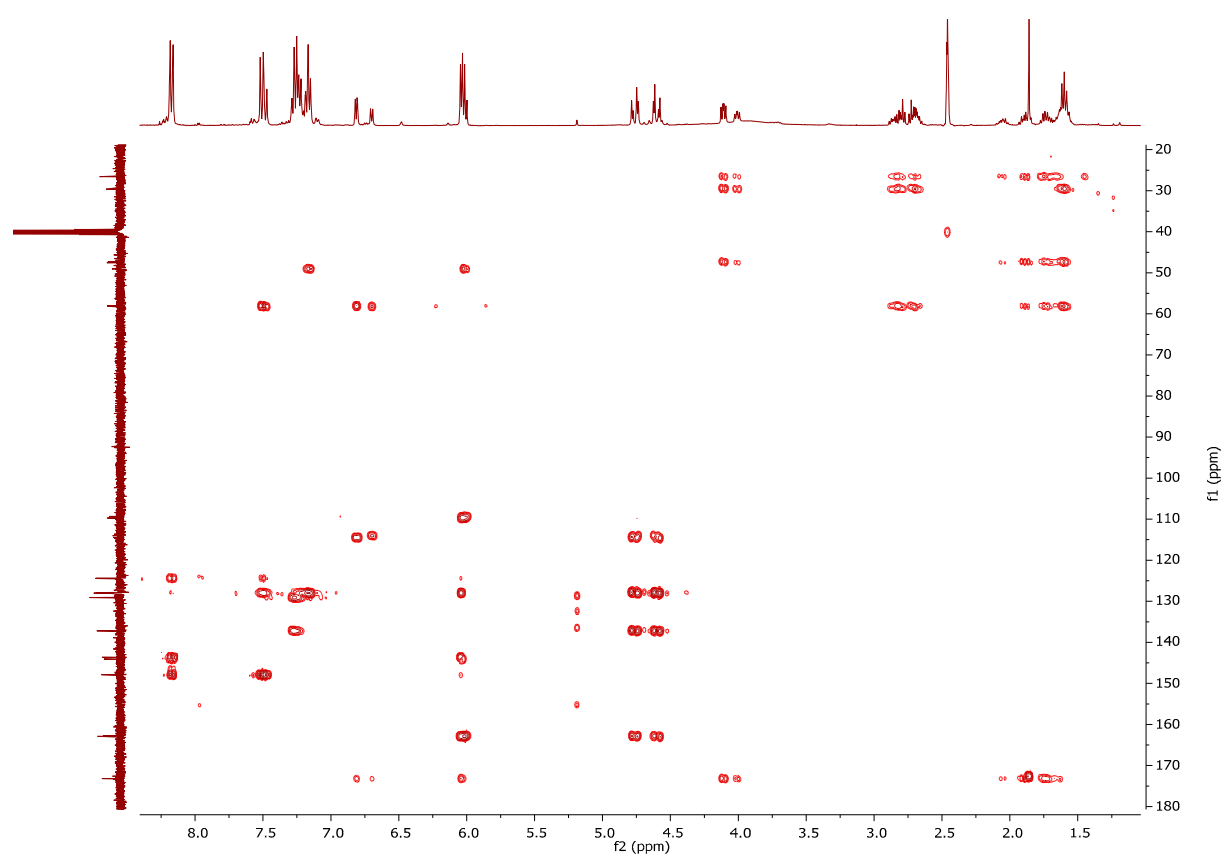

$^1\text{H}$  and  $^{13}\text{C}$  NMR spectra ( $d_6$ -DMSO) for compound 3a

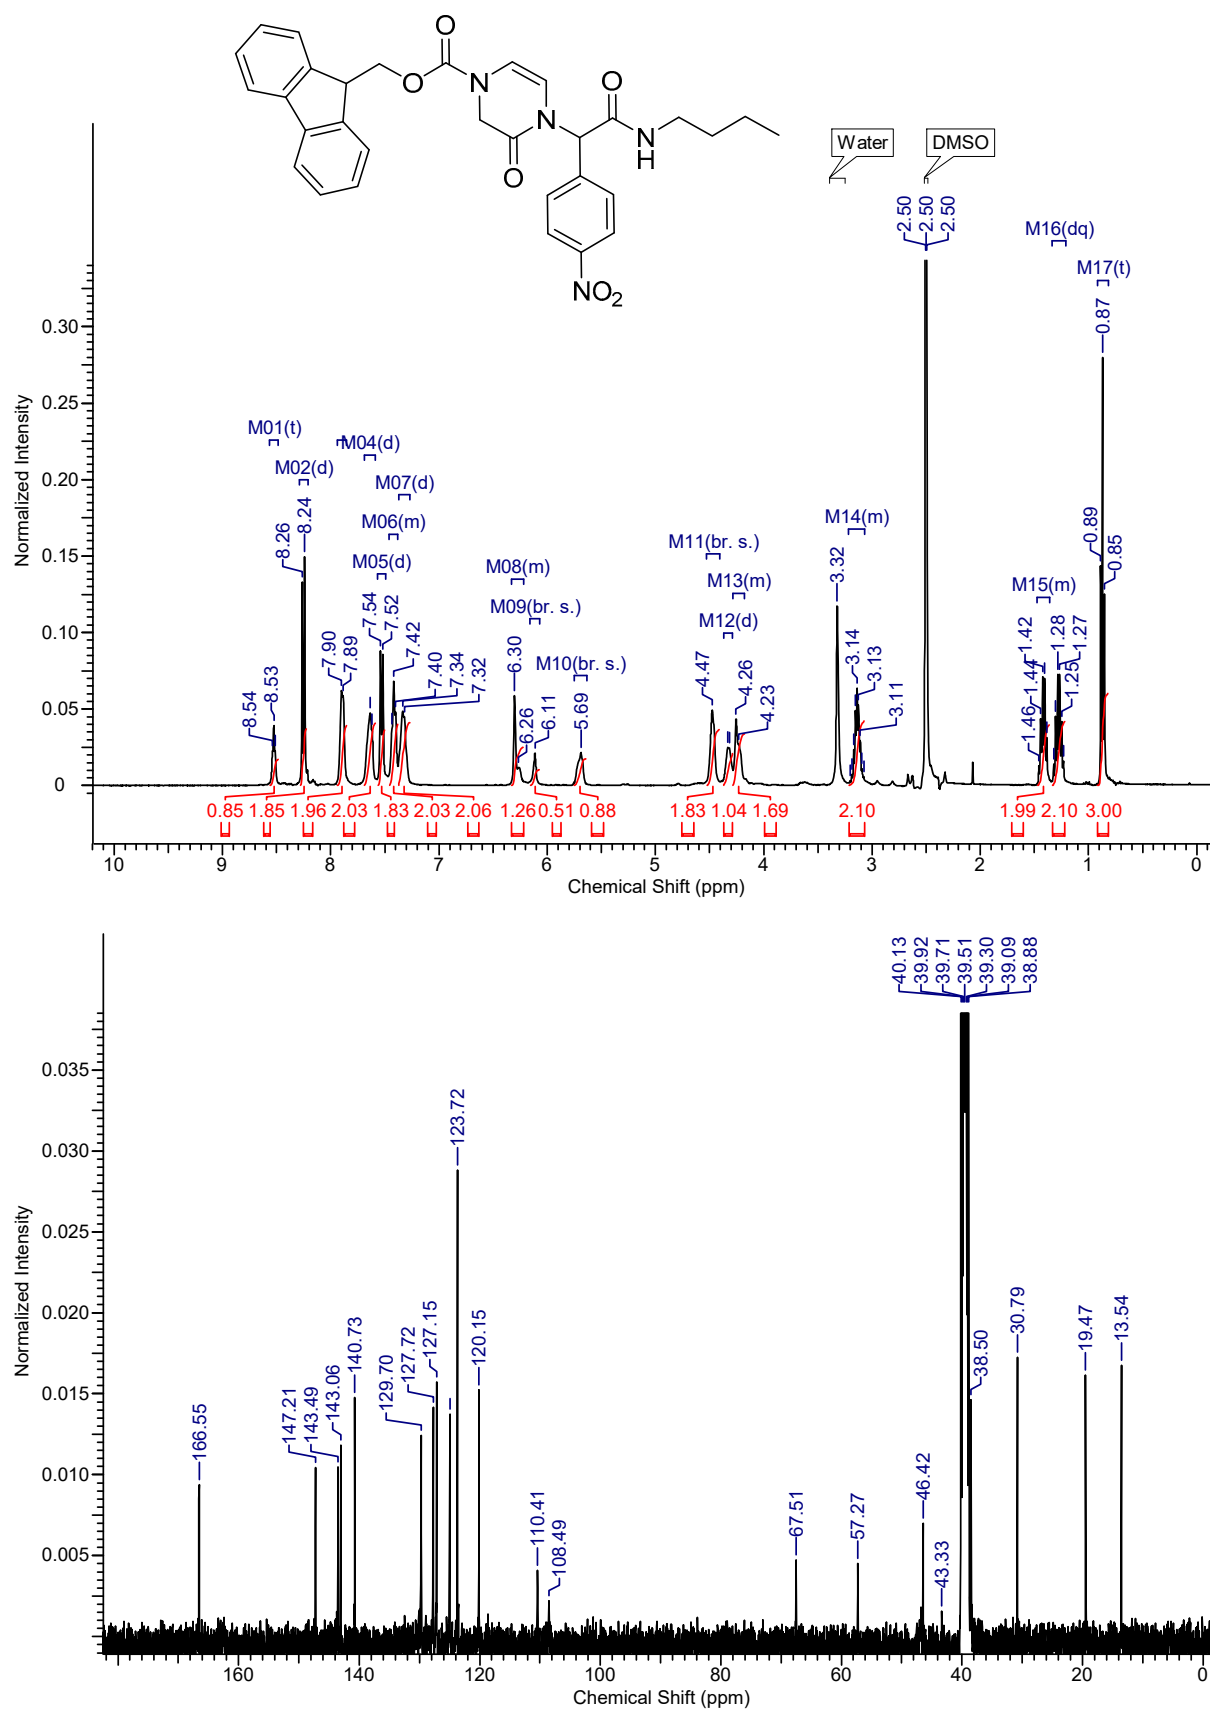

$^1\text{H}$  and  $^{13}\text{C}$  NMR spectra ( $d_6$ -DMSO) for compound 3b

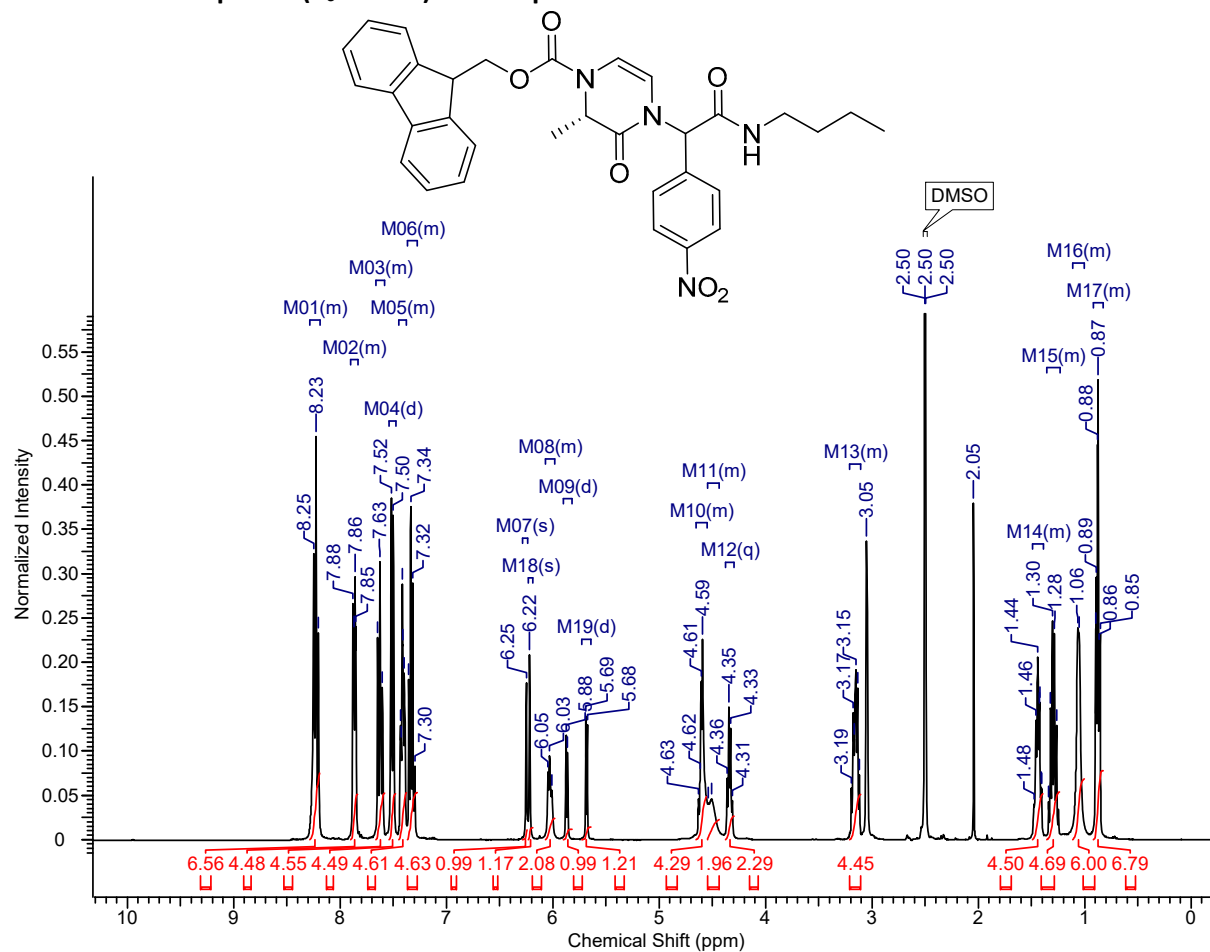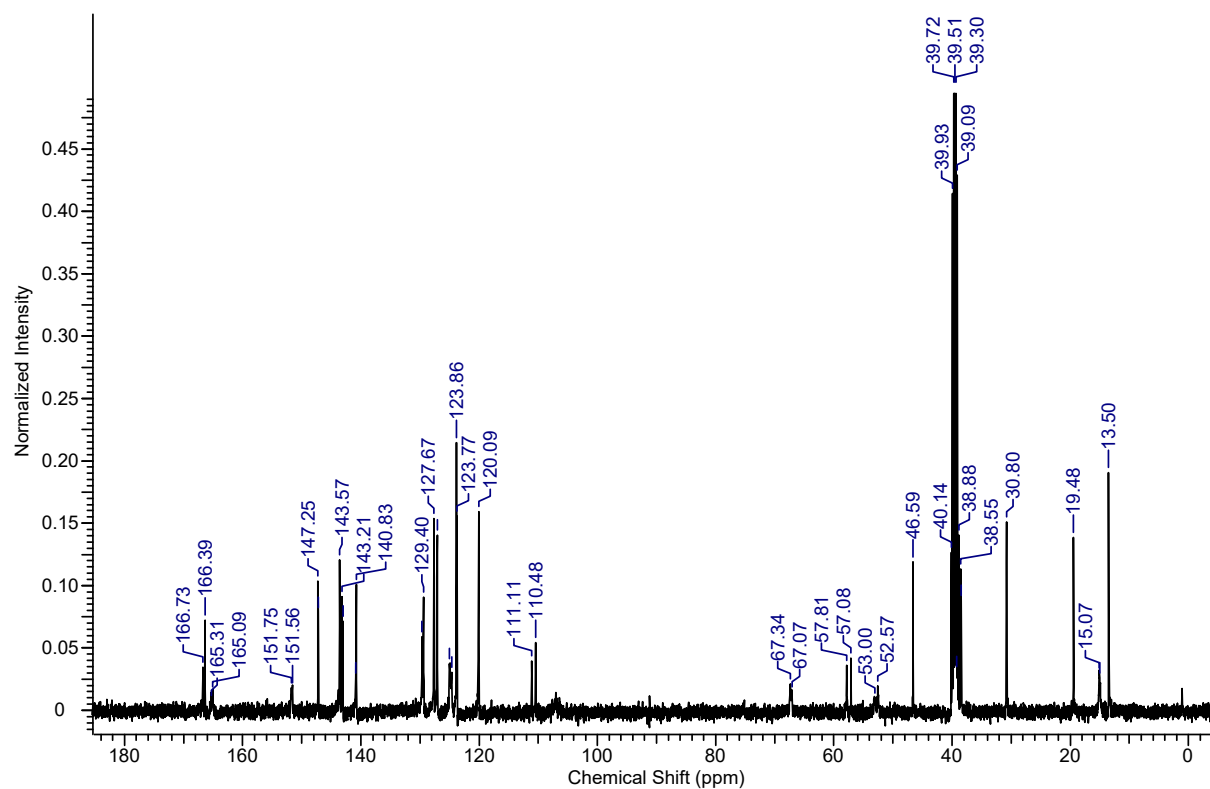

$^1\text{H}$  and  $^{13}\text{C}$  NMR spectra ( $d_6$ -DMSO) for compound 3c

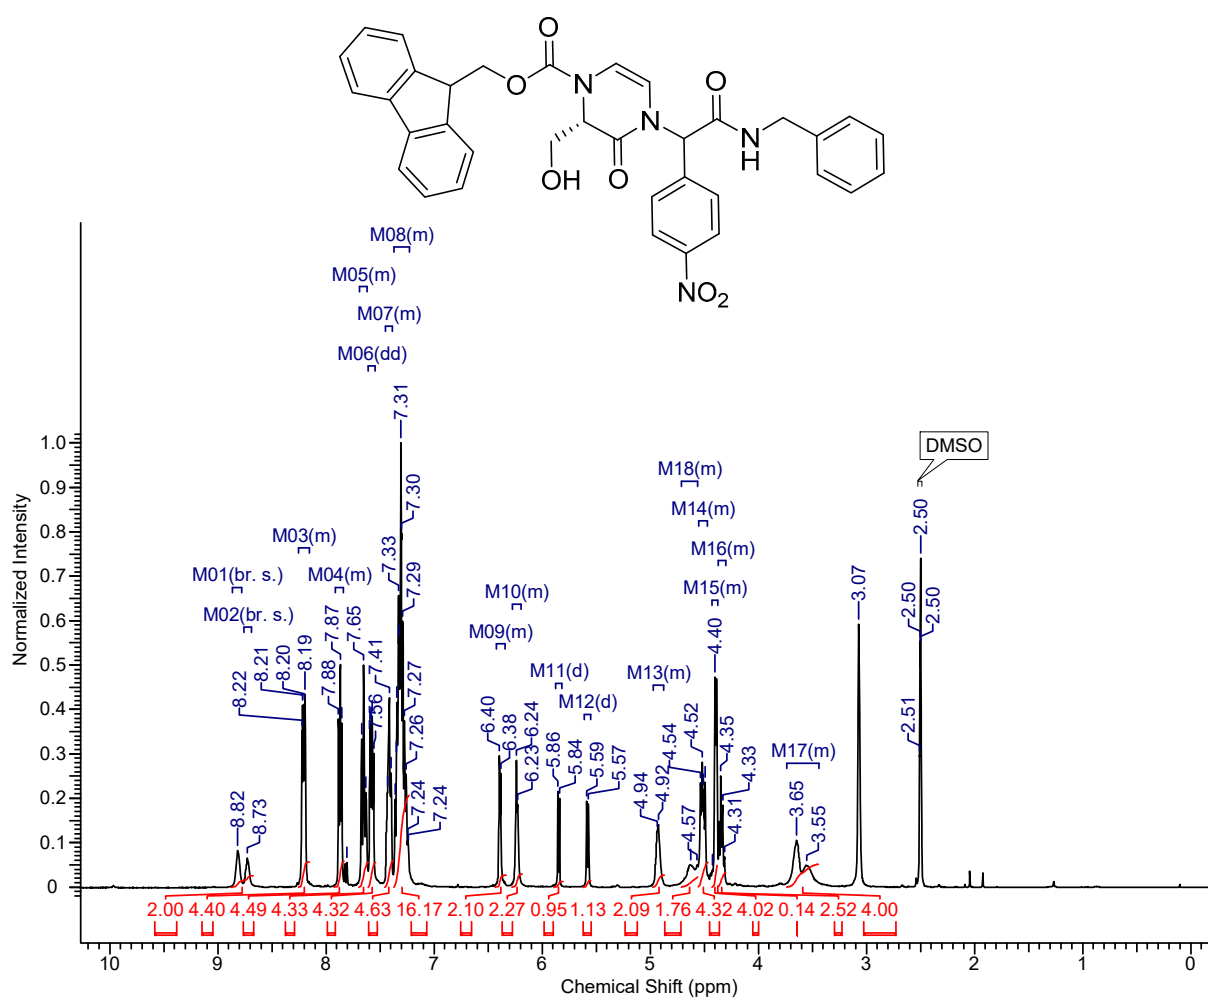

$^1\text{H}$  and  $^{13}\text{C}$  NMR spectra ( $d_6$ -DMSO) for compound 4a

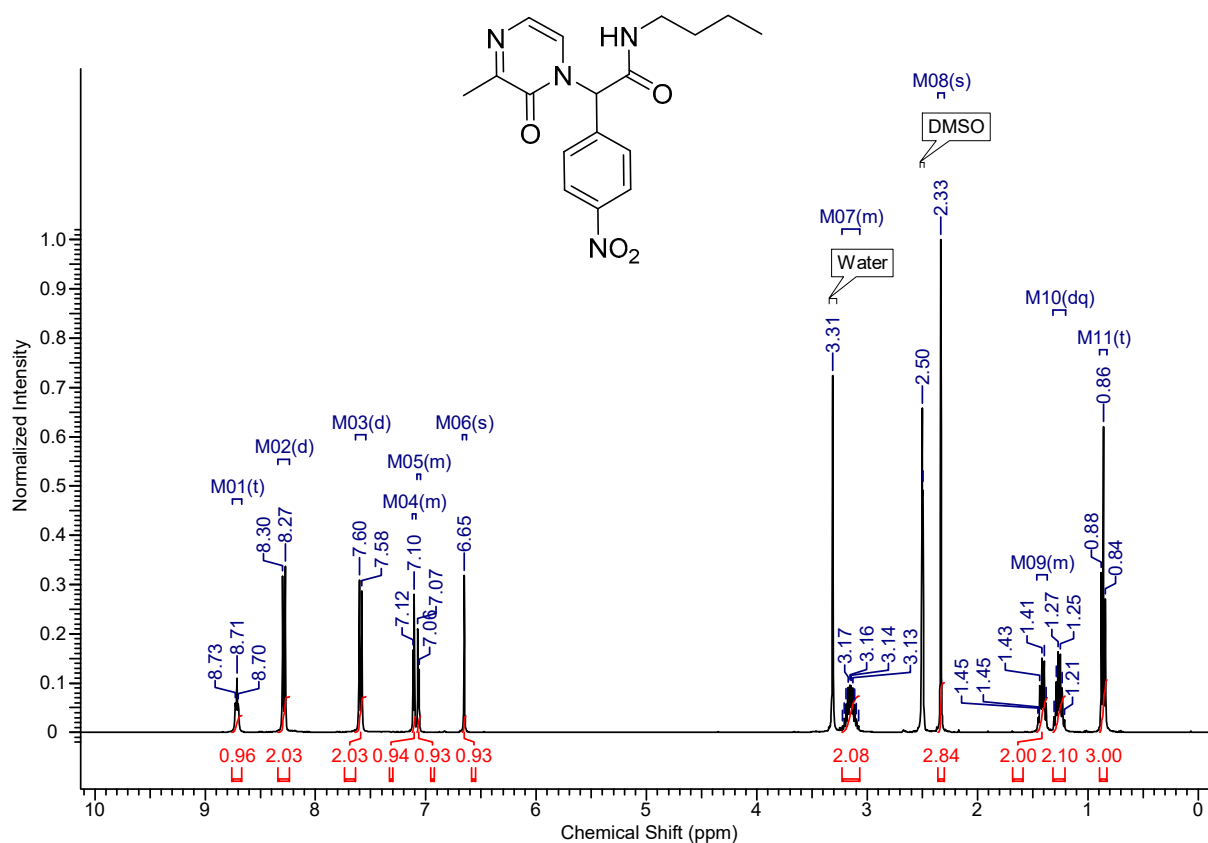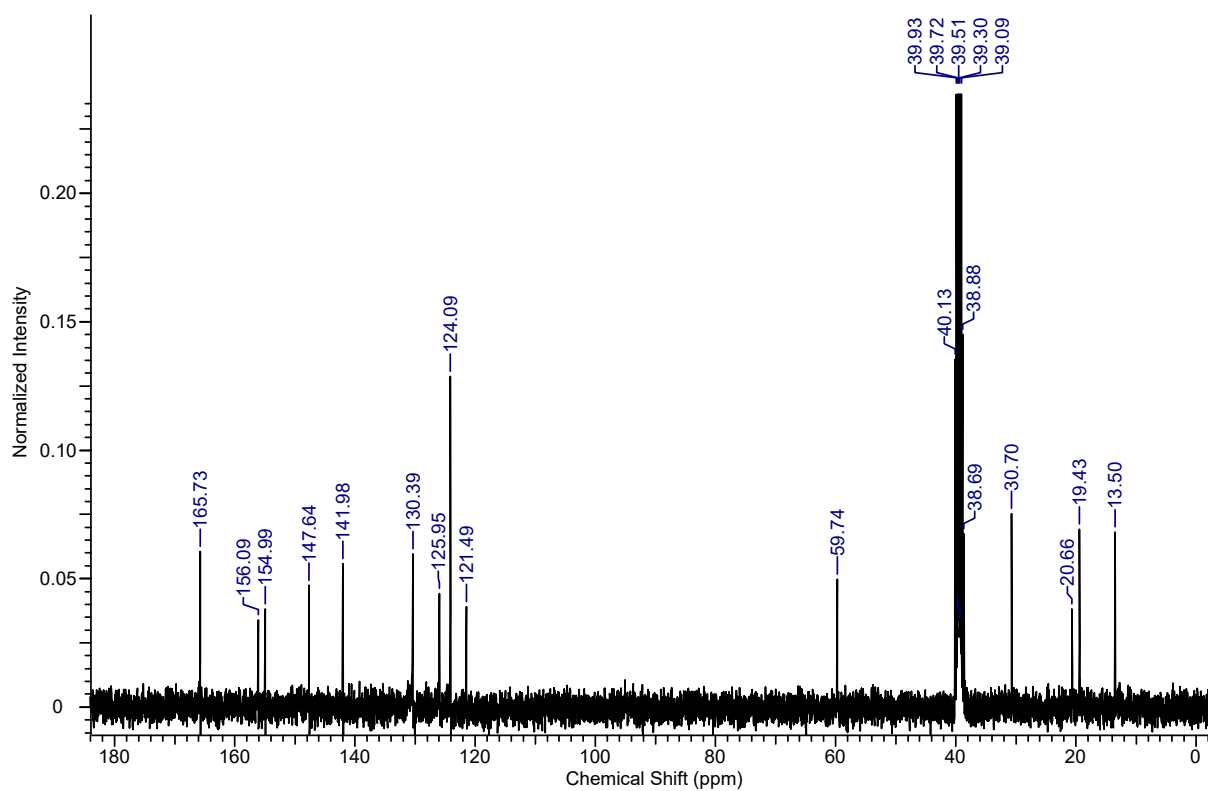

$^1\text{H}$  and  $^{13}\text{C}$  NMR spectra ( $d_6$ -DMSO) for compound 4b

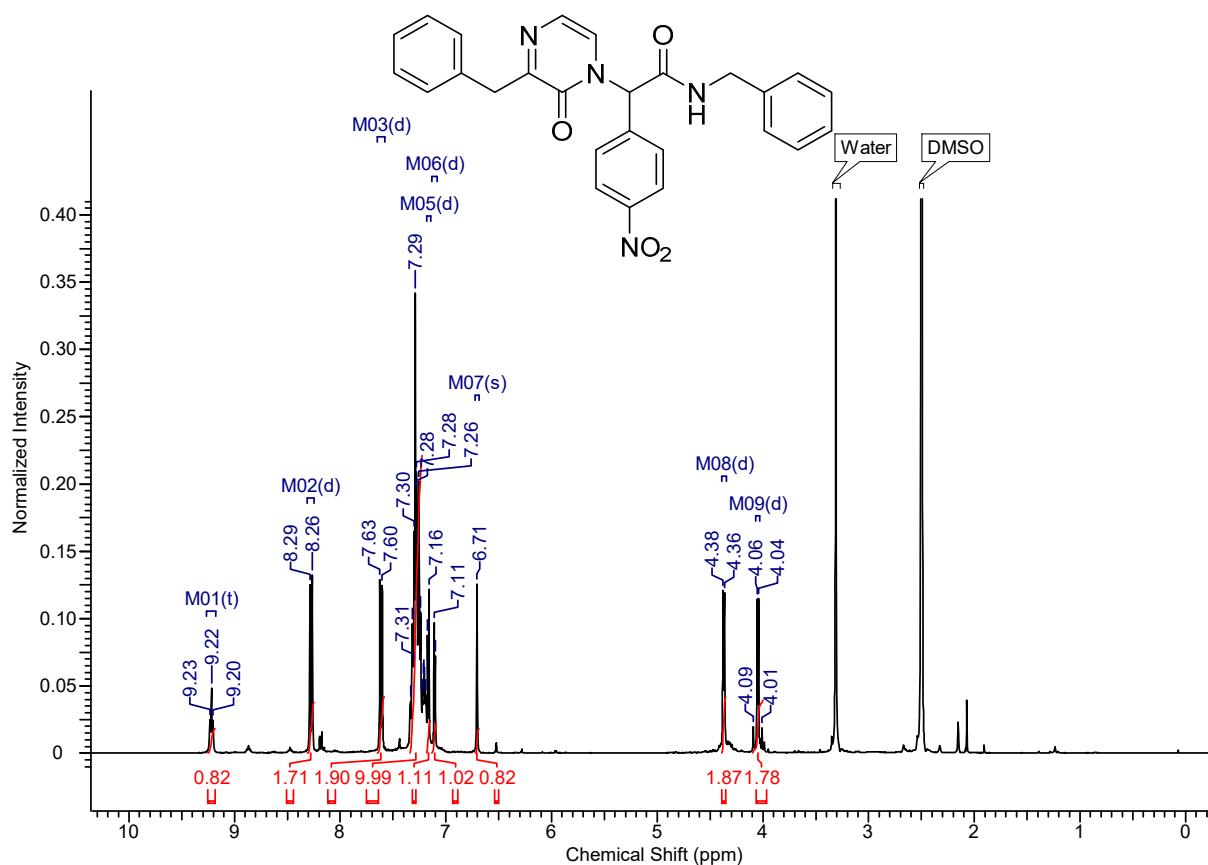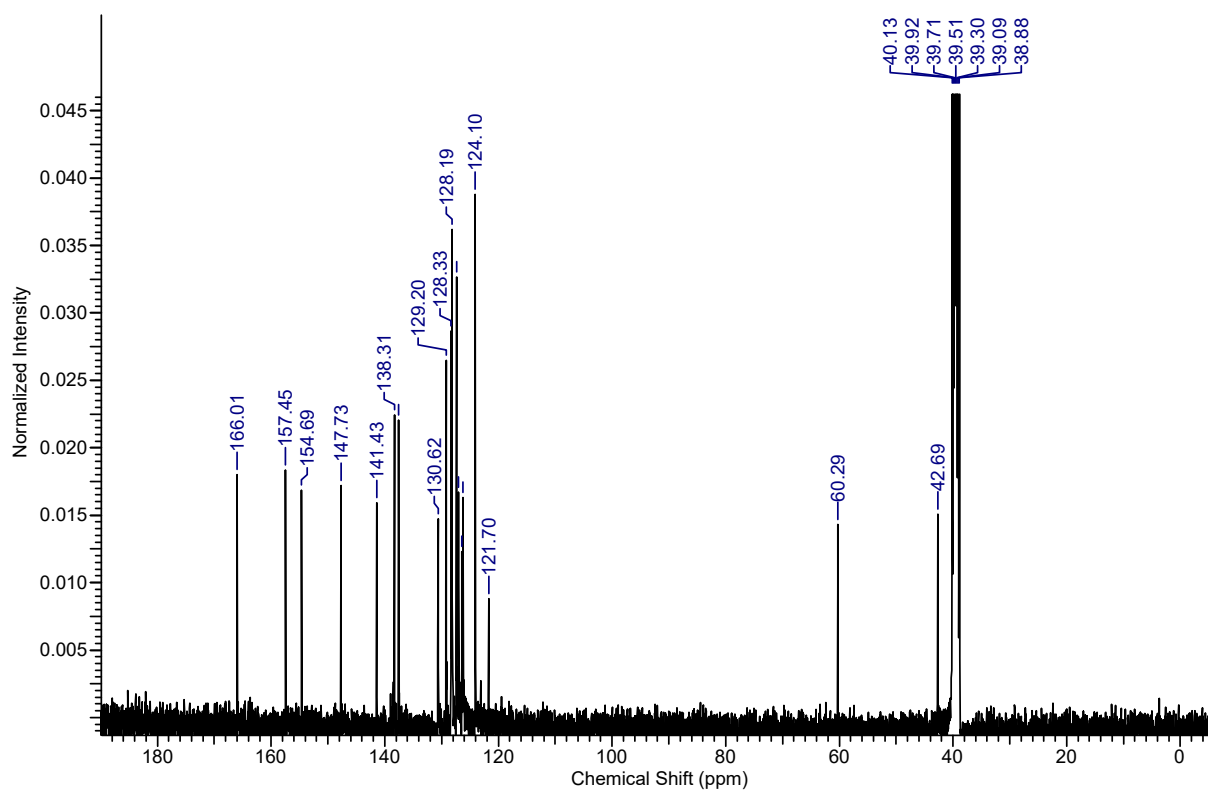

Chemical structure of compound 10: O=C(NCc1ccccc1)C(c2ccc([N+](=O)[O-])cc2)N3CC[C@H](Cc4ccccc4)C3=O

<sup>1</sup>H NMR spectrum (DMSO-d<sub>6</sub>) of compound 10. The x-axis represents the chemical shift in ppm, ranging from 10 to 0. The y-axis represents the normalized intensity, ranging from 0 to 1.0. The spectrum shows several peaks, with integration values provided below the baseline.

Peak assignments and integration values:

- 8.88 (t, 2.00)
- 8.87 (t, 2.13)
- 8.85 (t, 2.05)
- 8.84 (t, 2.12)
- 8.82 (t, 23.87)
- 8.24 (t, 1.01)
- 8.22 (t, 0.98)
- 8.20 (t, 4.21)
- 8.18 (t, 0.97)
- 8.16 (t, 1.04)
- 8.14 (t, 1.06)
- 8.12 (t, 1.78)
- 8.10 (t, 1.07)
- 8.08 (t, 1.05)
- 8.06 (t, 9.00)
- 7.26 (t, 4.36)
- 7.25 (t, 4.42)
- 7.24 (t, 4.40)
- 7.23 (t, 3.48)
- 7.22 (t, 3.35)
- 7.21 (t, 3.32)
- 7.20 (t, 2.93)
- 7.19 (t, 2.91)
- 7.18 (t, 2.87)
- 7.17 (t, 2.86)
- 7.16 (t, 2.85)
- 7.15 (t, 2.83)
- 7.14 (t, 2.82)
- 7.13 (t, 2.80)
- 7.12 (t, 2.67)
- 7.11 (t, 2.67)
- 7.10 (t, 2.67)
- 7.09 (t, 2.67)
- 7.08 (t, 2.67)
- 7.07 (t, 2.67)
- 7.06 (t, 2.67)
- 7.05 (t, 2.67)
- 7.04 (t, 2.67)
- 7.03 (t, 2.67)
- 7.02 (t, 2.67)
- 7.01 (t, 2.67)
- 7.00 (t, 2.67)
- 6.36 (t, 4.36)
- 6.34 (t, 4.42)
- 6.33 (t, 4.40)
- 6.32 (t, 3.48)
- 6.31 (t, 3.35)
- 6.30 (t, 3.32)
- 6.29 (t, 2.93)
- 6.28 (t, 2.91)
- 6.27 (t, 2.87)
- 6.26 (t, 2.86)
- 6.25 (t, 2.85)
- 6.24 (t, 2.83)
- 6.23 (t, 2.82)
- 6.22 (t, 2.80)
- 6.21 (t, 2.67)
- 6.20 (t, 2.67)
- 6.19 (t, 2.67)
- 6.18 (t, 2.67)
- 6.17 (t, 2.67)
- 6.16 (t, 2.67)
- 6.15 (t, 2.67)
- 6.14 (t, 2.67)
- 6.13 (t, 2.67)
- 6.12 (t, 2.67)
- 6.11 (t, 2.67)
- 6.10 (t, 2.67)
- 6.09 (t, 2.67)
- 6.08 (t, 2.67)
- 6.07 (t, 2.67)
- 6.06 (t, 2.67)
- 6.05 (t, 2.67)
- 6.04 (t, 2.67)
- 6.03 (t, 2.67)
- 6.02 (t, 2.67)
- 6.01 (t, 2.67)
- 6.00 (t, 2.67)
- 5.99 (t, 2.67)
- 5.98 (t, 2.67)
- 5.97 (t, 2.67)
- 5.96 (t, 2.67)
- 5.95 (t, 2.67)
- 5.94 (t, 2.67)
- 5.93 (t, 2.67)
- 5.92 (t, 2.67)
- 5.91 (t, 2.67)
- 5.90 (t, 2.67)
- 5.89 (t, 2.67)
- 5.88 (t, 2.67)
- 5.87 (t, 2.67)
- 5.86 (t, 2.67)
- 5.85 (t, 2.67)
- 5.84 (t, 2.67)
- 5.83 (t, 2.67)
- 5.82 (t, 2.67)
- 5.81 (t, 2.67)
- 5.80 (t, 2.67)
- 5.79 (t, 2.67)
- 5.78 (t, 2.67)
- 5.77 (t, 2.67)
- 5.76 (t, 2.67)
- 5.75 (t, 2.67)
- 5.74 (t, 2.67)
- 5.73 (t, 2.67)
- 5.72 (t, 2.67)
- 5.71 (t, 2.67)
- 5.70 (t, 2.67)
- 5.69 (t, 2.67)
- 5.68 (t, 2.67)
- 5.67 (t, 2.67)
- 5.66 (t, 2.67)
- 5.65 (t, 2.67)
- 5.64 (t, 2.67)
- 5.63 (t, 2.67)
- 5.62 (t, 2.67)
- 5.61 (t, 2.67)
- 5.60 (t, 2.67)
- 5.59 (t, 2.67)
- 5.58 (t, 2.67)
- 5.57 (t, 2.67)
- 5.56 (t, 2.67)
- 5.55 (t, 2.67)
- 5.54 (t, 2.67)
- 5.53 (t, 2.67)
- 5.52 (t, 2.67)
- 5.51 (t, 2.67)
- 5.50 (t, 2.67)
- 5.49 (t, 2.67)
- 5.48 (t, 2.67)
- 5.47 (t, 2.67)
- 5.46 (t, 2.67)
- 5.45 (t, 2.67)
- 5.44 (t, 2.67)
- 5.43 (t, 2.67)
- 5.42 (t, 2.67)
- 5.41 (t, 2.67)
- 5.40 (t, 2.67)
- 5.39 (t, 2.67)
- 5.38 (t, 2.67)
- 5.37 (t, 2.67)
- 5.36 (t, 2.67)
- 5.35 (t, 2.67)
- 5.34 (t, 2.67)
- 5.33 (t, 2.67)
- 5.32 (t, 2.67)
- 5.31 (t, 2.67)
- 5.30 (t, 2.67)
- 5.29 (t, 2.67)
- 5.28 (t, 2.67)
- 5.27 (t, 2.67)
- 5.26 (t, 2.67)
- 5.25 (t, 2.67)
- 5.24 (t, 2.67)
- 5.23 (t, 2.67)
- 5.22 (t, 2.67)
- 5.21 (t, 2.67)
- 5.20 (t, 2.67)
- 5.19 (t, 2.67)
- 5.18 (t, 2.67)
- 5.17 (t, 2.67)
- 5.16 (t, 2.67)
- 5.15 (t, 2.67)
- 5.14 (t, 2.67)
- 5.13 (t, 2.67)
- 5.12 (t, 2.67)
- 5.11 (t, 2.67)
- 5.10 (t, 2.67)
- 5.09 (t, 2.67)
- 5.08 (t, 2.67)
- 5.07 (t, 2.67)
- 5.06 (t, 2.67)
- 5.05 (t, 2.67)
- 5.04 (t, 2.67)
- 5.03 (t, 2.67)
- 5.02 (t, 2.67)
- 5.01 (t, 2.67)
- 5.00 (t, 2.67)
- 4.99 (t, 2.67)
- 4.98 (t, 2.67)
- 4.97 (t, 2.67)
- 4.96 (t, 2.67)
- 4.95 (t, 2.67)
- 4.94 (t, 2.67)
- 4.93 (t, 2.67)
- 4.92 (t, 2.67)
- 4.91 (t, 2.67)
- 4.90 (t, 2.67)
- 4.89 (t, 2.67)
- 4.88 (t, 2.67)
- 4.87 (t, 2.67)
- 4.86 (t, 2.67)
- 4.85 (t, 2.67)
- 4.84 (t, 2.67)
- 4.83 (t, 2.67)
- 4.82 (t, 2.67)
- 4.81 (t, 2.67)
- 4.80 (t, 2.67)
- 4.79 (t, 2.67)
- 4.78 (t, 2.67)
- 4.77 (t, 2.67)
- 4.76 (t, 2.67)
- 4.75 (t, 2.67)
- 4.74 (t, 2.67)
- 4.73 (t, 2.67)
- 4.72 (t, 2.67)
- 4.71 (t, 2.67)
- 4.70 (t, 2.67)
- 4.69 (t, 2.67)
- 4.68 (t, 2.67)
- 4.67 (t, 2.67)
- 4.66 (t, 2.67)
- 4.65 (t, 2.67)
- 4.64 (t, 2.67)
- 4.63 (t, 2.67)
- 4.62 (t, 2.67)
- 4.61 (t, 2.67)
- 4.60 (t, 2.67)
- 4.59 (t, 2.67)
- 4.58 (t, 2.67)
- 4.57 (t, 2.67)
- 4.56 (t, 2.67)
- 4.55 (t, 2.67)
- 4.54 (t, 2.67)
- 4.53 (t, 2.67)
- 4.52 (t, 2.67)
- 4.51 (t, 2.67)
- 4.50 (t, 2.67)
- 4

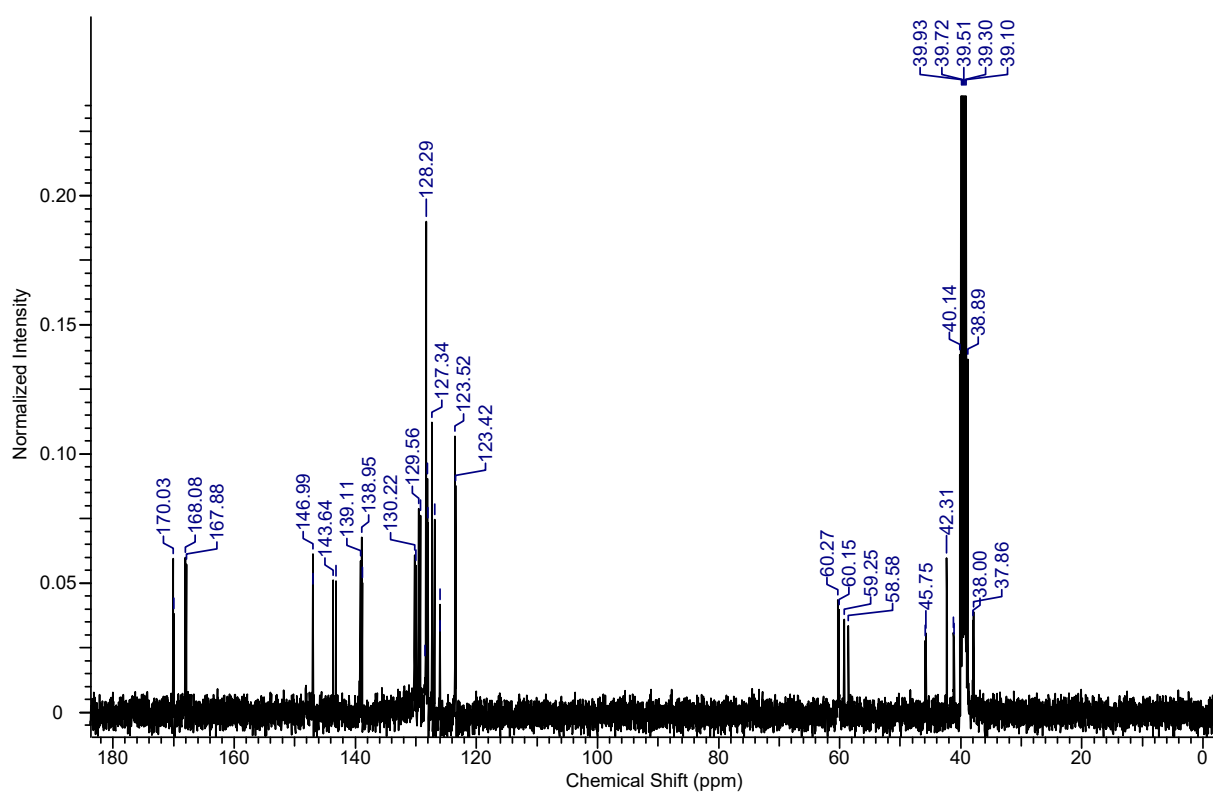



$^1\text{H}$  and  $^{13}\text{C}$  NMR spectra ( $d_6$ -DMSO) for compound 6a

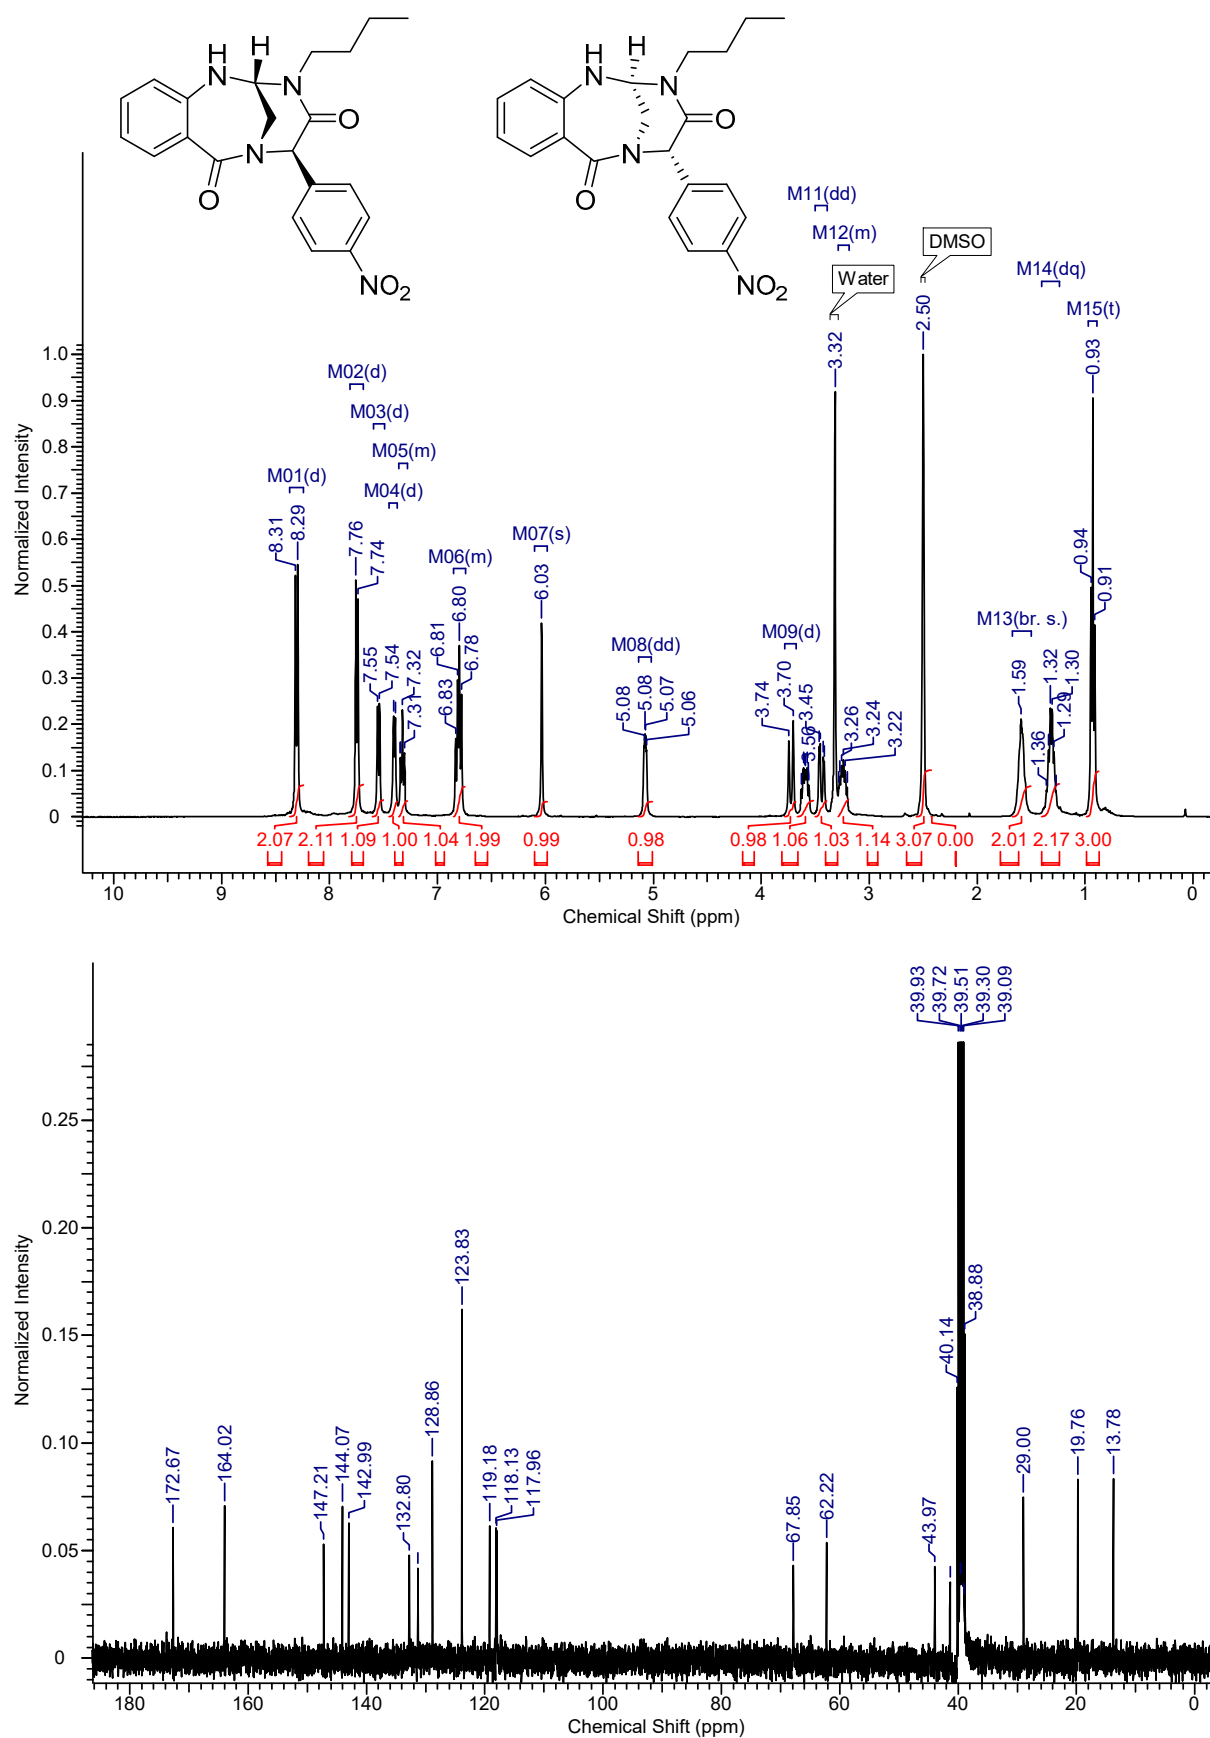

$^1\text{H} - ^1\text{H}$  COSY spectrum ( $d_6$ -DMSO) for compound 6a

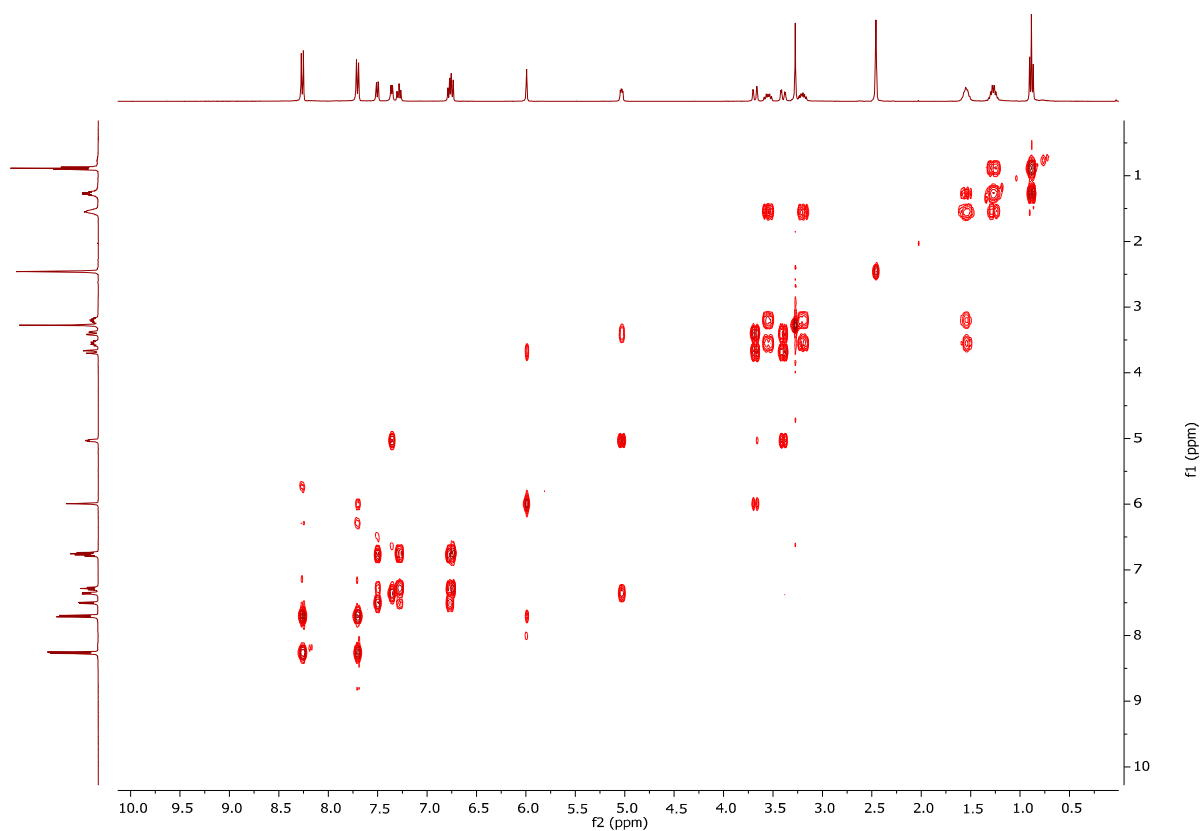

$^1\text{H} - ^{13}\text{C}$  HMBC spectrum ( $d_6$ -DMSO) for compound 6a

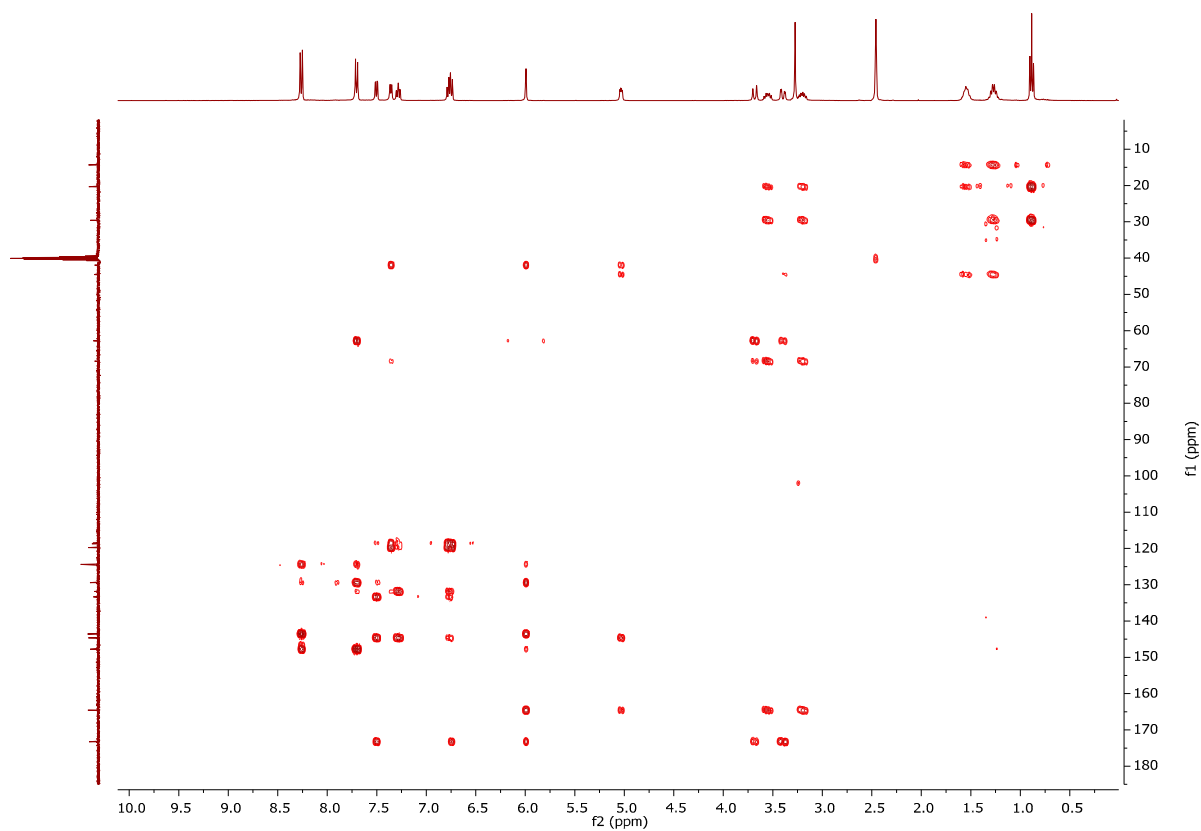

Supplement: s1 [file s1]
